# Supplementary material for: Detection and treatment initiation for depression and alcohol use disorders: facility-based cross-sectional studies in five low-income and middle-income country districts
Source: PubMed Central journal article supplement — BMJ Open. 2018 Oct 10;8(10):e023421. doi: 10.1136/bmjopen-2018-023421 (PMC6252626; doi:10.1136/bmjopen-2018-023421), 2018-10-10
Supplement: bmjopen-2018-023421.draft_revisions.pdf [file bmjopen-2018-023421.draft_revisions.pdf]

# BMJ Open

BMJ Open is committed to open peer review. As part of this commitment we make the peer review history of every article we publish publicly available.

When an article is published we post the peer reviewers' comments and the authors' responses online. We also post the versions of the paper that were used during peer review. These are the versions that the peer review comments apply to.

The versions of the paper that follow are the versions that were submitted during the peer review process. They are not the versions of record or the final published versions. They should not be cited or distributed as the published version of this manuscript.

BMJ Open is an open access journal and the full, final, typeset and author-corrected version of record of the manuscript is available on our site with no access controls, subscription charges or pay-per-view fees (<http://bmjopen.bmj.com>).

If you have any questions on BMJ Open's open peer review process please email [info.bmjopen@bmj.com](mailto:info.bmjopen@bmj.com)

# BMJ Open

## Detection and treatment initiation for depression and alcohol use disorders: facility-based cross-sectional studies in five low- and middle-income country districts

|                               |                                                                                                                                                                                                                                                                                                                                                                                                                                                                                                                                                                                                                                                                                                                                                                                                                                                                                                                                                                                                                                                                                                                                                                                                                                                                                                                                                                                                                                                                                                                                                                                                                                                                                                                                                                                                                                                                                   |
|-------------------------------|-----------------------------------------------------------------------------------------------------------------------------------------------------------------------------------------------------------------------------------------------------------------------------------------------------------------------------------------------------------------------------------------------------------------------------------------------------------------------------------------------------------------------------------------------------------------------------------------------------------------------------------------------------------------------------------------------------------------------------------------------------------------------------------------------------------------------------------------------------------------------------------------------------------------------------------------------------------------------------------------------------------------------------------------------------------------------------------------------------------------------------------------------------------------------------------------------------------------------------------------------------------------------------------------------------------------------------------------------------------------------------------------------------------------------------------------------------------------------------------------------------------------------------------------------------------------------------------------------------------------------------------------------------------------------------------------------------------------------------------------------------------------------------------------------------------------------------------------------------------------------------------|
| Journal:                      | <i>BMJ Open</i>                                                                                                                                                                                                                                                                                                                                                                                                                                                                                                                                                                                                                                                                                                                                                                                                                                                                                                                                                                                                                                                                                                                                                                                                                                                                                                                                                                                                                                                                                                                                                                                                                                                                                                                                                                                                                                                                   |
| Manuscript ID                 | bmjopen-2018-023421                                                                                                                                                                                                                                                                                                                                                                                                                                                                                                                                                                                                                                                                                                                                                                                                                                                                                                                                                                                                                                                                                                                                                                                                                                                                                                                                                                                                                                                                                                                                                                                                                                                                                                                                                                                                                                                               |
| Article Type:                 | Research                                                                                                                                                                                                                                                                                                                                                                                                                                                                                                                                                                                                                                                                                                                                                                                                                                                                                                                                                                                                                                                                                                                                                                                                                                                                                                                                                                                                                                                                                                                                                                                                                                                                                                                                                                                                                                                                          |
| Date Submitted by the Author: | 06-Apr-2018                                                                                                                                                                                                                                                                                                                                                                                                                                                                                                                                                                                                                                                                                                                                                                                                                                                                                                                                                                                                                                                                                                                                                                                                                                                                                                                                                                                                                                                                                                                                                                                                                                                                                                                                                                                                                                                                       |
| Complete List of Authors:     | <p>Rathod, Sujit; London School of Hygiene and Tropical Medicine, Department of Population Health</p> <p>Roberts, Tessa; London School of Hygiene and Tropical Medicine, Population Health, Faculty of Epidemiology and Population Health; King's College London, Health Services and Population Research Department</p> <p>Medhin, Girmay; Addis Ababa University, Akililu Lemma Institute of Pathology</p> <p>Murhar, Vaibhav; The Centre for Chronic Conditions and Injuries, Public Health foundation of India</p> <p>Samudre, Sandesh; The Centre for Chronic Conditions and Injuries, Public Health foundation of India; King's College London, Health Services and Population Research Department</p> <p>Luitel, Nagendra; Transcultural Psychosocial Organization (TPO) Nepal</p> <p>Selohilwe, One; University of KwaZulu-Natal College of Health Sciences, Centre for Rural Health</p> <p>Ssebunnya, Joshua; Butabika National Referral and Teaching Mental Hospital, Kampala</p> <p>Jordans, MJ; King's College London,</p> <p>Bhana, Arvin; University of KwaZulu-Natal, School of Applied Human Sciences</p> <p>Petersen, I.; University of KwaZulu-Natal College of Health Sciences, Centre for Rural Health</p> <p>Kigozi, Fred; Butabika National Referral and Teaching Mental Hospital, Kampala</p> <p>Nakku, Juliet; Butabika National Referral and Teaching Mental Hospital, Kampala</p> <p>Lund, Crick; King's College London, Centre for Global Mental Health; University of Cape Town , Alan J Flisher Centre for Public Mental Health</p> <p>Fekadu, Abebaw; Addis Ababa University, Centre for Innovative Drug Development and Therapeutic Trials for Africa; Brighton and Sussex Medical School, Global Health &amp; Infection Department</p> <p>Shidhaye, Rahul; Centre for Mental Health, Public health foundation of India; Maastricht University</p> |
| Keywords:                     | Depression & mood disorders < PSYCHIATRY, PRIMARY CARE, alcohol use disorder, clinical detection, low- and middle-income countries                                                                                                                                                                                                                                                                                                                                                                                                                                                                                                                                                                                                                                                                                                                                                                                                                                                                                                                                                                                                                                                                                                                                                                                                                                                                                                                                                                                                                                                                                                                                                                                                                                                                                                                                                |
|                               |                                                                                                                                                                                                                                                                                                                                                                                                                                                                                                                                                                                                                                                                                                                                                                                                                                                                                                                                                                                                                                                                                                                                                                                                                                                                                                                                                                                                                                                                                                                                                                                                                                                                                                                                                                                                                                                                                   |

1  
2  
3  
4  
5  
6  
7  
8  
9  
10  
11  
12  
13  
14  
15  
16  
17  
18  
19  
20  
21  
22  
23  
24  
25  
26  
27  
28  
29  
30  
31  
32  
33  
34  
35  
36  
37  
38  
39  
40  
41  
42  
43  
44  
45  
46  
47  
48  
49  
50  
51  
52  
53  
54  
55  
56  
57  
58  
59  
60

SCHOLARONE™  
Manuscripts

For peer review only

1  
2  
3 Detection and treatment initiation for depression and alcohol use disorders: facility-based  
4 cross-sectional studies in five low- and middle-income country districts  
5  
6  
7  
8

9 Sujit D Rathod\*, Tessa Roberts, Girmay Medhin, Vaibhav Murhar, Sandesh Samudre,  
10 Nagendra P. Luitel, One Selohilwe, Joshua Ssebunnya, Mark Jordans, Arvin Bhana, Inge  
11 Petersen, Fred Kigozi, Juliet Nakku, Crick Lund, Abebaw Fekadu\*\*, Rahul Shidhaye\*\*  
12  
13

14  
15  
16 Sujit D Rathod, Department of Population Health, London School of Hygiene & Tropical  
17 Medicine, United Kingdom  
18

19 Tessa Roberts, Centre for Global Mental Health, Department of Population Health, London  
20 School of Hygiene & Tropical Medicine, United Kingdom, and Department of Health  
21 Services and Population Research, Institute of Psychiatry, Psychology & Neuroscience,  
22 King's College London, United Kingdom. [tessa.roberts@lshtm.ac.uk](mailto:tessa.roberts@lshtm.ac.uk)  
23

24 Girmay Medhin, Aklilu Lemma Institute of Pathobiology, Addis Ababa University, Ethiopia.  
25 [gtmedhin@yahoo.com](mailto:gtmedhin@yahoo.com)  
26  
27

28 Vaibhav Murhar, Sangath, Bhopal, India. [vaibhav.murhar@sangath.in](mailto:vaibhav.murhar@sangath.in)  
29

30 Sandesh Samudre, Institute of Psychiatry, Psychology and Neuroscience, Health Services and  
31 Population Research Department, King's College London, UK and Centre for Chronic  
32 Conditions and Injuries, Public Health Foundation of India, New Delhi, India.  
33 [sandesh.samudre@kcl.ac.uk](mailto:sandesh.samudre@kcl.ac.uk)  
34

35 Nagendra P. Luitel, Transcultural Psychosocial Organization (TPO) Nepal Kathmandu,  
36 Kathmandu Nepal, [luitelnp@gmail.com](mailto:luitelnp@gmail.com)  
37  
38

39 One Selohilwe, Centre for Rural Health, School of Nursing and Public Health, University of  
40 KwaZulu-Natal, Durban, South Africa. [selohilwe@ukzn.ac.za](mailto:selohilwe@ukzn.ac.za)  
41

42 Joshua Ssebunnya, Makerere University/Butabika National Referral and Teaching Mental  
43 Hospital, Kampala – Uganda. [joy95h@yahoo.co.uk](mailto:joy95h@yahoo.co.uk)  
44

45 Mark Jordans, Centre for Global Mental Health, Institute of Psychiatry, Psychology and  
46 Neurosciences, King's College London, United Kingdom. [mark.jordans@kcl.ac.uk](mailto:mark.jordans@kcl.ac.uk)  
47  
48

49 Arvin Bhana, Health Systems Research Unit, South African Medical Research Council,  
50 Honorary Associate Professor, Centre for Rural Health, School of Nursing and Public Health,  
51 College of Health Sciences, University of KwaZulu-Natal. [arvin.bhana@gmail.com](mailto:arvin.bhana@gmail.com)  
52

53 Inge Petersen, Centre for Rural Health, School of Nursing and Public Health, University of  
54 KwaZulu-Natal, Durban, South Africa. [peterseni@ukzn.ac.za](mailto:peterseni@ukzn.ac.za)  
55  
56  
57  
58  
59

1  
2  
3 Fred Kigozi, Makerere University/ Butabika National Referral and Teaching Mental Hospital,  
4 Kampala – Uganda, [fredkigozi@yahoo.com](mailto:fredkigozi@yahoo.com)  
5

6 Juliet Nakku, Makerere University/ Butabika National Referral and Teaching Mental  
7 Hospital, Kampala – Uganda, [jnakku@yahoo.com](mailto:jnakku@yahoo.com)  
8

9 Crick Lund, Alan J Flisher Centre for Public Mental Health, Department of Psychiatry and  
10 Mental Health, University of Cape Town, South Africa; and Centre for Global Mental Health,  
11 Institute of Psychiatry, Psychology and Neurosciences, King's College London, United  
12 Kingdom. [crick.lund@uct.ac.za](mailto:crick.lund@uct.ac.za)  
13  
14

15 Abebaw Fekadu, Professor, Centre for Innovative Drug Development and Therapeutic Trials  
16 for Africa (CDT-Africa), College of Health Sciences, Addis Ababa University, Addis Ababa,  
17 Ethiopia; Global Health & Infection Department, Brighton and Sussex Medical School,  
18 Brighton, United Kingdom, [a.fekadu@bsms.ac.uk](mailto:a.fekadu@bsms.ac.uk)  
19  
20

21 Rahul Shidhaye, Public Health Foundation of India, New Delhi, India and CAPHRI (Care  
22 and Public Health Research Institute) and Maastricht University, Netherlands.  
23 [rahul.shidhaye@phfi.org](mailto:rahul.shidhaye@phfi.org)  
24

25 Word count: 3509  
26

27 \*Corresponding author: Department of Population Health, London School of Hygiene &  
28 Tropical Medicine, Keppel Street, United Kingdom WC1E7HT. [sujit.rathod@lshtm.ac.uk](mailto:sujit.rathod@lshtm.ac.uk) Ph:  
29 +44 0207 299 4683  
30  
31

32  
33 \*\* Contributed equally  
34  
35  
36  
37  
38  
39  
40  
41  
42  
43  
44  
45  
46  
47  
48  
49  
50  
51  
52  
53  
54  
55  
56  
57  
58  
59  
60

## Abstract

**Objectives:** To estimate the level of clinical detection and treatment initiation for depression and alcohol use disorder (AUD) in low- and middle-income country (LMIC) settings

**Design:** Five cross-sectional studies

**Setting:** Adult outpatient services in 36 primary health care facilities in Sodo District, Ethiopia (9 facilities); Sehore District, India (3); Chitwan District, Nepal (8); Dr Kenneth Kaunda District, South Africa (3); and Kamuli District, Uganda (13).

**Participants:** Between 760 and 1893 adults were screened in each district. Across 5 districts, between 4.2 and 20.1% screened positive for depression and between 1.2 and 16.4% screened positive for AUD. 96% of screen-positive participants provided details about their clinical consultations that day.

**Primary outcomes:** Detection of depression, treatment initiation for depression, detection of AUD, treatment initiation for AUD

**Results:** Among depression screen-positive participants, clinical detection of depression ranged from 0% in India to 11.7% in Nepal. Small proportions of screen-positive participants received treatment (0% in Ethiopia, India and South Africa to 4.2% in Uganda). Among AUD screen-positive participants, clinical detection of AUD ranged from 0% in Ethiopia and India to 7.8% in Nepal. Treatment was 0% in all countries aside Nepal, where it was 2.2%.

**Conclusions:** The findings of this study suggest large detection and treatment gaps for adult primary care patients, which are likely contributors to the population-level mental health treatment gap in LMIC. Primary care facilities remain unfulfilled intervention points for reducing the population-level burden of disease in LMIC.

### Strengths and limitations of the study

- This was a multi-country survey of diverse clinical settings, with large sample sizes, structured interviews, and used of validated screening tools to identify cases.
- The methods used here are demonstrably flexible and are replicable in other low-income settings, particularly for monitoring and evaluation purposes.
- We used highly sensitive and non-specific coding criteria for our primary outcomes (i.e. detection and treatment initiation), and so outcome misclassification is possible.

1  
2  
3  
4  
5  
6  
7  
8  
9  
10  
11  
12  
13  
14  
15  
16  
17  
18  
19  
20  
21  
22  
23  
24  
25  
26  
27  
28  
29  
30  
31  
32  
33  
34  
35  
36  
37  
38  
39  
40  
41  
42  
43  
44  
45  
46  
47  
48  
49  
50  
51  
52  
53  
54  
55  
56  
57  
58  
59  
60

**Keywords:** depression, alcohol use disorder, primary care, detection, treatment, low- and middle-income countries

For peer review only

## BACKGROUND

Mental, Neurological and Substance use disorders (MNS) contribute significantly to the Global Burden of Disease (GBD) and account for one in every 10 lost years of health globally.[1] In 2010, the absolute Disability-Adjusted Life-Years (DALYs) due to MNS disorders was 258 million DALYs which is 10.4% of the total disease burden. MNS disorders were also the leading cause of years lived with disability globally.[1] In addition to this, MNS disorders act as a significant risk factor for premature death [2] and also accounts for substantial adverse social and economic consequences.[1,3] Depression accounts for 40.5% of DALYs caused by mental and substance use disorders while Alcohol Use Disorders (AUD) account for 9.6%.[4]

In low- and middle-income countries (LMICs) the population-level treatment gap is estimated to be between 76.3% and 91.9% for depression and between 94.9% and 97.2% for AUD.[5] There is an emerging evidence base demonstrating that depression and AUD can be treated by primary care providers in LMIC [6]; the World Health Organization's mhGAP guidelines support integration of mental health services into primary care as a means of narrowing the treatment gap.[7] People affected by depression and AUD often present in primary health care facilities [8,9] though not specifically for these disorders. These disorders co-occur with both acute and chronic medical problems; an untreated mental health disorder worsens the prognosis for the co-morbid condition.[10,11] The population-level treatment gap can be reduced by enhancing the capacity of primary care staff to detect, diagnose and treat these disorders.[12] Clinical detection of depression is estimated to be 47% from a meta-analysis of 41 studies conducted in primary care settings [13] and 42% for AUD from a meta-analysis of 12 studies. [14] However, these meta-analyses were not able to identify studies conducted in LMIC settings, where the majority of people with depression and AUD in the world live, and where a paucity of mental health in the pre-service training of general health care providers as well as competing demands in under-resourced healthcare systems likely compromise the ability of clinicians to detect mental disorders. Little is therefore known regarding the detection levels of depression and AUD in primary care settings in LMICs.

The aims of this report were to describe the methods and baseline findings of a multi-round study to measure the level of clinical detection and treatment initiation for depression and for AUD among adult attendees of primary health care facilities in five low- and middle-income country districts.



## METHODS

### Context, setting and participants

PRIME is a six-year multi-country research program consortium which, in collaboration with national and district Ministries of Health, has developed Mental Health Care Plans to support delivery of services for mental disorders in the public sector in Ethiopia (Sodo District), India (Sehore District, Madhya Pradesh State), Nepal (Chitwan District), South Africa (Dr Kenneth Kaunda District, North West Province), and Uganda (Kamuli District).[15,16] Two key research questions of the PRIME evaluation – detailed in a separate report [17] - were to assess the change in detection and change in initiation of treatment among adults presenting in primary health facilities, as a consequence of implementing the district mental healthcare plans. These questions were investigated by conducting cross-sectional facility-based patient surveys before and after the mental healthcare plan implementation. The two populations of interest for the study were the adult patients who screened positive 1) for depression and 2) for AUD.

Details about the study settings and clinics are in Table 1.

Table 1. Geographic and health facility characteristics of PRIME implementation areas, 2013-2014.

| Country                                                 | Ethiopia                                                                                       | India                                                                | Nepal                                                                                                                        | South Africa                                                                                      | Uganda                                                                                                                                                |
|---------------------------------------------------------|------------------------------------------------------------------------------------------------|----------------------------------------------------------------------|------------------------------------------------------------------------------------------------------------------------------|---------------------------------------------------------------------------------------------------|-------------------------------------------------------------------------------------------------------------------------------------------------------|
| <b>Implementation area</b>                              | Sodo District                                                                                  | Sehore and Shyampur sub-districts of Sehore District, Madhya Pradesh | Chitwan District*                                                                                                            | Orkney catchment area of Matlosana sub-district of Dr Kenneth Kaunda District, Northwest Province | Kamuli District                                                                                                                                       |
| <b>Population</b>                                       | 161,952                                                                                        | 212,192                                                              | 108,368                                                                                                                      | 90,000                                                                                            | 518,200                                                                                                                                               |
| <b>Area, km<sup>2</sup></b>                             | 867                                                                                            | 1,039                                                                | 342                                                                                                                          | 31                                                                                                | 4,278                                                                                                                                                 |
| <b># and type of health facility</b>                    | 8 public and 1 private health clinics                                                          | 3 Community Health Centres                                           | 9 Health Posts and 1 Primary Health Care Centre**                                                                            | 1 Community Health Centre (CHC) and 3 Primary Health Care (PHC) clinics***                        | 12 Health Centres (Level III and IV) 1 primary care department in the district hospital                                                               |
| <b>Primary provider types</b>                           | Health Officer                                                                                 | Medical Officer                                                      | Medical officers, Health Assistants, Auxiliary Health Workers                                                                | Nurse, PHC doctor                                                                                 | Medical Officer                                                                                                                                       |
| <b>Primary care services provided in the facilities</b> | Primary care, Emergency; delivery care, mother and baby care, family planning and immunization | Primary, acute, Reproductive and child health                        | Outpatient; immunization; family planning; safe motherhood and new born care; anti- and post-natal care; delivery of babies. | Chronic care                                                                                      | Outpatient; emergency; immunization; maternal and child health; family planning, health education and Primary care in general including mental health |

\* Implementation area consists of 10 of the 38 Village Development Committees/Municipalities of Chitwan District

\*\* 222 study participants from 2 of the 10 health facilities are excluded from analysis

\*\*\* 1 of the 3 PHC clinics was an implementation pilot site and was excluded from study data collection.

1  
2  
3 The choice of included clinics was determined by the availability of staff who were planned  
4 to have authority to detect/ diagnose, prescribe and/or refer for depression and AUD, as per  
5 the mental healthcare plan. Thus, clinics such as health posts (Level I and II) in Uganda were  
6 excluded. In South Africa, one of the PHC clinics was excluded from the study due to mental  
7 health care plan training prior to the baselines survey round. In South Africa, nurses in the  
8 primary care clinics could refer suspected cases to a physician (for both disorders) and  
9 provide brief counselling (for non-dependent alcohol use disorder) and so these clinics were  
10 included. Only patients attending for chronic care services (e.g. HIV, tuberculosis, diabetes,  
11 hypertension, etc) were eligible for this study, reflecting eligibility for treatment in  
12 accordance with the South African mental health care plan. In Nepal, clinicians working in  
13 two clinics received mental health training prior to the baseline survey round; these clinics  
14 are included for clinical-level descriptive reporting but participants from these clinics are  
15 excluded for analysis here. All clinics were government run, aside one in Ethiopia.

### 24 **Sample size**

25  
26  
27 For each country and disorder the sample size was set to have 80% power and a two-sided  
28 alpha of 0.05 for the two primary aims: 1) to detect a change in detection and 2) to detect a  
29 change in initiation of evidence-based treatment for depression and for AUD between the  
30 baseline and follow-up round. The baseline round was set prior to implementation of the  
31 mental health care plan and follow-up round was scheduled to start at least 18 months later,  
32 which assumed the plan had been fully embedded for several months. Country teams in  
33 Nepal and Uganda planned to conduct an interim survey round immediately after embedding,  
34 to assess the short-term effect of implementation on detection and treatment. Findings from  
35 interim and follow-up surveys will be detailed in future reports. Depending on country, the  
36 baseline level of detection was assumed to be 0-5%, and at follow-up targeted to reach 20-  
37 30%. The required sample size was adjusted to account for the possibility of false positives  
38 generated by screening tools, using site-specific figures for the positive predictive value.  
39 Within each country, whichever disorder required the higher sample size dictated the sample  
40 size. This sample size was increased by a factor of 2-3x to facilitate equity analyses, e.g.  
41 comparisons of outcomes by sex or by socioeconomic status. The target sample sizes for each  
42 country in each study round were 1000 in Ethiopia, 760 in India, 1400 in Nepal, 1200 in  
43 South Africa and 1800 in Uganda. Within each country the total target sample size was then  
44 allocated by clinic in proportion to measures of clinic outpatient volume, such that busier  
45 clinics were allocated a larger recruitment target than less busy clinics.

1  
2  
3 Details of the sampling and data collection procedures in Table 2.  
4  
5  
6  
7  
8  
9  
10  
11  
12  
13  
14  
15  
16  
17  
18  
19  
20  
21  
22  
23  
24  
25  
26  
27  
28  
29  
30  
31  
32  
33  
34  
35  
36  
37  
38  
39  
40  
41  
42  
43  
44  
45  
46  
47  
48  
49  
50  
51  
52  
53  
54  
55  
56  
57  
58  
59  
60

Table 2. Sample selection and data collection procedures for facility surveys, 2013-2014.

| <b>Country site</b>                              | <b>Ethiopia</b>                                      | <b>India</b>                                                       | <b>Nepal</b>                                                                    | <b>South Africa</b>                                                            | <b>Uganda</b>                                                                          |
|--------------------------------------------------|------------------------------------------------------|--------------------------------------------------------------------|---------------------------------------------------------------------------------|--------------------------------------------------------------------------------|----------------------------------------------------------------------------------------|
| <b>Survey dates</b>                              | June-July 2013                                       | Aug-Oct 2013                                                       | Sept 2013-Feb 2014                                                              | Feb-April 2014                                                                 | July-Nov 2013                                                                          |
| <b>Study language</b>                            | Amharic                                              | Hindi                                                              | Nepali                                                                          | English, seTswana                                                              | English, Luganda                                                                       |
| <b>Recruitment / sampling method</b>             | Consecutive sampling of adults at registration       | Systematic sampling of every 5 <sup>th</sup> adult at registration | Random selection of 1 adult from those who arrived since last interview started | Opportunistic sampling of adult volunteers in chronic care clinic waiting area | Consecutive sampling of adults at registration                                         |
| <b>Consent documented with</b>                   | Signature or thumbprint                              | Signature or thumbprint                                            | Signature or verbal affirmation                                                 | Signature or signed 'X' with independent witness signature                     | Signature or verbal affirmation.                                                       |
| <b># approached</b>                              | 1014                                                 | 760                                                                | 1553                                                                            | 9780                                                                           | 1922                                                                                   |
| <b># eligible</b>                                | 1014                                                 | 760                                                                | 1553                                                                            | 1322                                                                           | 1922                                                                                   |
| <b># consented (% consent rate)</b>              | 1014 (100)                                           | 760 (100)                                                          | 1474 (94.9)                                                                     | 1322 (100)                                                                     | 1893 (98.5)                                                                            |
| <b>Questionnaire data collection mode</b>        | Paper-and-pencil, double data entry with EpiInfo 3.1 | Android mobile device                                              | Android mobile device                                                           | Android mobile device                                                          | Android mobile device                                                                  |
| <b>Depression screen positive is PHQ-9 &gt;=</b> | 10                                                   | 10                                                                 | 10                                                                              | 10                                                                             | 10                                                                                     |
| <b>AUD screen positive is AUDIT &gt;=</b>        | 8                                                    | 8                                                                  | 9                                                                               | 16                                                                             | 8                                                                                      |
| <b>Clinical consultation form</b>                | Purpose-built form                                   | Extracted from clinical records maintained at the facility         | Purpose-built form                                                              | Extracted from clinic records                                                  | Consultation notes extracted from patient's notebook as part of the exit questionnaire |

## Sampling and recruitment

Inclusion criteria for participation were as follows: above age of majority in the country (i.e. 16 years or 18 years); fluency in a local study language; time and ability to complete the full interview; and willingness to provide informed consent. Exclusion criteria were as follows: incapacity to provide informed consent (e.g. presence of severe intellectual disability, currently experiencing an acute medical issue). The research team for each country trained its interviewers to assess eligibility.

Logistic and cultural constraints dictated the sampling procedure within each country, meaning that random selection for a representative sample was not always possible. In Ethiopia and Uganda, to minimize disruption, consecutive sampling of all eligible patients upon registration minimized the amount of time research staff spent in the clinics. In South Africa, research staff provided a group orientation to the study to all patients in the waiting room, and then asked interested patients to self-nominate for recruitment. In India, research assistants approached every fifth patient registering at reception and assessed them for eligibility. Among eligible patients approached, over 94% consented to participate in all countries.

## Data collection procedures

The facility interview was comprised of a screening questionnaire, an exit questionnaire and/or a clinical consultation form. Interviewers administered the two-part screening questionnaire, with part 1 used to identify probable cases. For probable cases and optionally for probable non-cases, interviewers completed part 2 of the screening questionnaire. For these same participants, the interviewer completed the exit questionnaire with the participant and/or requested a consultation form from that participant's clinician. In Uganda patients maintained their own medical files in a notebook which is handed over to clinicians during consultations, and so the clinical consultation form data were synonymous with exit questionnaire data. The data collection flow chart for each country is shown as Supplemental Figures 1a-1e.

The sections within the screening interview questionnaire are described in Table 3.

Table 3. Screening interview sections for PRIME facility detection study, 2013-2014.

| Section                                             | # items | Source                                                                                                                                      |
|-----------------------------------------------------|---------|---------------------------------------------------------------------------------------------------------------------------------------------|
| Part 1                                              |         |                                                                                                                                             |
| Basic demographic characteristics                   | 5       | Purpose-built for PRIME                                                                                                                     |
| Alcohol use disorder screening                      | 10      | Alcohol Use Disorder Identification Test (AUDIT) [18]                                                                                       |
| Alcohol: recent treatment history and intentions    | 23      | Purpose-built for PRIME                                                                                                                     |
| Alcohol: internalized stigma                        | 20      | Adapted from the Composite International Diagnostic Interview Services module [19] and the Barriers to Access to Care Evaluation Scale [20] |
| Depression screening                                | 9       | Patient's Health Questionnaire (PHQ-9) [21]                                                                                                 |
| Depression symptoms in the past 12 months           | 1       | Purpose-built for PRIME                                                                                                                     |
| Depression: recent treatment history and intentions | 23      | Purpose-built for PRIME                                                                                                                     |
| Depression: internalized stigma                     | 20      | Adapted from the Composite International Diagnostic Interview Services module [19] and the Barriers to Access to Care Evaluation Scale [20] |
| Suicidality                                         | 7       | Adapted from the Composite International Diagnostic Interview (CIDI) suicidality module [19].                                               |
| Part 2                                              |         |                                                                                                                                             |
| Disability                                          | 12      | World Health Organization Disability Assessment Schedule (WHODAS) 2.0 [22]                                                                  |
| Detailed sociodemographic characteristics           | 18      | Purpose-built for PRIME                                                                                                                     |

### Data collection measures

Part 1 of the screening questionnaire consisted of sections on sociodemographic characteristics, screening for depression, depression symptoms in the past 12 months (aside in Ethiopia), and screening for AUD. A probable case of depression was a participant who was PHQ-9 positive or had recent depression symptoms, and a probable case of AUD was a participant who was AUDIT positive. Probable cases completed disorder-specific sections about recent (12 month) history of treatment seeking for their most recent episode of symptoms, and about internalized stigma. Part 2 consisted sections about sociodemographic characteristics and disability status. The exit questionnaire and clinical consultation form were thematically similar, and consisted of a mix of open- and closed-ended questions about that day's clinical consultation, and specifically about diagnoses, advice, referrals and prescriptions. Each country developed their own exit questionnaire and clinical consultation form to enable data collection by interviewers with the participant and by the clinician directly, respectively, in recognition of the context specific nature of patient-clinician interactions and the local idioms of distress. In addition to the questionnaire items described here, which were largely consistent across PRIME country sites, research teams included country-specific questions and sections, which will be described in future reports. See PRIME website ([www.prime.uct.ac.za](http://www.prime.uct.ac.za)) for the purpose-built sections of the PRIME questionnaires.

### Mental health measures

The denominators for the primary outcome measures consist of those participants who screen positive for depression or for AUD, using the PHQ-9 and AUDIT, respectively. The PHQ-9 is a widely used screening tool that has been validated for use in all five countries.[23–27]. In this study, Cronbach's alpha for the PHQ-9 ranged between 0.74 in India and 0.80 in Nepal. A score of 10 or more on the PHQ-9 screen was considered a positive screen. The AUDIT tool has been validated in India, Nepal and South Africa [28–30] and in countries neighbouring Uganda.[31,32] In this study, Cronbach's alpha for AUDIT ranged from 0.66 in Uganda to 0.88 in Nepal. An AUDIT score of  $\geq 20$  was considered to indicate alcohol dependence, while scores of 16-19 and 8-15 were classified as harmful and hazardous drinking, respectively. A score of 8 or more in Ethiopia, India and Uganda, 9 or more in Nepal and 16 or more in South Africa, was considered a positive screen. The higher cut off



1  
2  
3 score in South Africa was set to account for services being targeted to those with harmful and  
4 dependent alcohol use.  
5

### 6 7 **Outcome assessment**

8  
9 The numerators for the primary outcome measures were derived from participant exit  
10 questionnaire data when available (India, Nepal, South Africa, Uganda), and alternatively  
11 from the clinician consultation form data (Ethiopia). Given the sparse level of detail patients  
12 were expected to recall and/or clinicians were expected to record, cross-country variation in  
13 the terminology around detection and treatment, as well as expected low levels of detection  
14 and treatment at baseline, highly sensitive and non-specific coding criteria – detailed in Table  
15 4 - were adopted and used for the outcomes' numerators. These criteria were informed by  
16 WHO's mhGAP guidelines.[7]  
17  
18  
19  
20  
21  
22  
23  
24  
25  
26  
27  
28  
29  
30  
31  
32  
33  
34  
35  
36  
37  
38  
39  
40  
41  
42  
43  
44  
45  
46  
47  
48  
49  
50  
51  
52  
53  
54  
55  
56  
57  
58  
59  
60

Table 4: Criteria used to assess detection and treatment of depression and alcohol use disorders in the PRIME facility detection study, 2013-2014.

| <b>Detection of depression</b>                                                                                                                                                                                                                                                                                                                                                                                                                                                                                                | <b>Treatment of depression</b>                                                                                                                                                                                                                                                                                                                                                                                                                                                                                                                                                                                   |
|-------------------------------------------------------------------------------------------------------------------------------------------------------------------------------------------------------------------------------------------------------------------------------------------------------------------------------------------------------------------------------------------------------------------------------------------------------------------------------------------------------------------------------|------------------------------------------------------------------------------------------------------------------------------------------------------------------------------------------------------------------------------------------------------------------------------------------------------------------------------------------------------------------------------------------------------------------------------------------------------------------------------------------------------------------------------------------------------------------------------------------------------------------|
| <p><i>Included:</i></p> <ul style="list-style-type: none"> <li>• Diagnosis of “depression”</li> <li>• Diagnosis of “stress”, “distress”, “behavioural problem”, “mental disorder”, or “psychiatric problem”</li> <li>• Diagnosis assumed if unambiguous depression treatment given</li> </ul> <p><i>Excluded:</i></p> <ul style="list-style-type: none"> <li>• Diagnosis of “anxiety”, “insomnia”, “tension headache”, “stress headache”, “schizophrenia”, “epilepsy”, “bipolar”, “central nervous system problem”</li> </ul> | <p><i>Included:</i></p> <ul style="list-style-type: none"> <li>• Prescription of SSRI (e.g. fluoxetine)</li> <li>• Referral to a mental health specialist</li> <li>• Advice on stress reduction or management - only with depression diagnosis</li> <li>• Prescription of tricyclic antidepressant (e.g. amitriptyline) only with depression diagnosis</li> <li>• Referral to counselling or talking treatment – only with depression diagnosis</li> </ul> <p><i>Excluded:</i></p> <ul style="list-style-type: none"> <li>• Diazepam prescription</li> <li>• Non-specific referrals (e.g. "hospital")</li> </ul> |
| <b>Detection of alcohol use disorder</b>                                                                                                                                                                                                                                                                                                                                                                                                                                                                                      | <b>Treatment of alcohol use disorder</b>                                                                                                                                                                                                                                                                                                                                                                                                                                                                                                                                                                         |
| <p><i>Included:</i></p> <ul style="list-style-type: none"> <li>• Diagnosis of “AUD”, “alcohol problem” or “drinking problem”</li> <li>• Diagnosis assumed if unambiguous AUD treatment given</li> </ul> <p><i>Excluded:</i></p> <ul style="list-style-type: none"> <li>• Drug abuse or other substance use problems</li> </ul>                                                                                                                                                                                                | <p><i>Included:</i></p> <ul style="list-style-type: none"> <li>• Referral to a mental health or addictions specialist</li> <li>• Prescription of diazepam or Vitamin B – only with AUD diagnosis</li> <li>• Counselling or talking treatment – only with AUD diagnosis</li> </ul> <p><i>Excluded:</i></p> <ul style="list-style-type: none"> <li>• Non-specific referrals (e.g. "hospital")</li> </ul>                                                                                                                                                                                                           |

Abbreviations: AUD, alcohol use disorder; SSRI, selective serotonin reuptake inhibitor

1  
2  
3 Outcome assessors (TR, SS and SDR) independently double-coded the outcomes for  
4 detection (Yes/No) and treatment (Yes/No) with 99% initial scoring agreement.  
5  
6 Disagreements were resolved through further discussion.  
7

### 8 **Analysis**

9  
10 First, the sociodemographic characteristics and mental health screening scores of participants  
11 were summarised by presenting the median and interquartile range for continuous measures  
12 and counts and percentages for categorical measures. Second, for depression screen-positive  
13 participants, the numbers and proportions who had outcome data, were detected for  
14 depression, and who had initiation of minimally adequate evidence-based treatment were  
15 reported. The same figures were reported for AUD screen-positive participants and AUD.  
16 Finally, depression and AUD detection figures are reported for participants who were  
17 depression and AUD screen-negative and who did not have depression symptoms over the  
18 past 12 months. These latter figures are indicators – though not definitive evidence - for  
19 either mis- or over-diagnosis. All analyses were conducted in Stata 14.1 (StataCorp, College  
20 Station, TX, USA), and stratified by country. (See supplemental file ‘stata do file code.docx’)  
21  
22  
23  
24  
25  
26  
27  
28

### 29 **Ethics**

30  
31 All participants gave written or verbal informed consent prior to being interviewed (Table 2).  
32 The informed consent form made clear there would be no negative effects for non-  
33 participation. In South Africa, participants were provided a 30 Rand (~2.80 USD)  
34 supermarket voucher as a token of appreciation. In all countries, participants who endorsed  
35 questionnaire items about suicidality were referred to a provider in the clinic.  
36  
37  
38  
39

40 The institutional review boards of the World Health Organization (Geneva, Switzerland),  
41 University of Cape Town (South Africa), College of Health Sciences of Addis Ababa  
42 University (Ethiopia), Indian Council of Medical Research (New Delhi, India), Sangath (Goa,  
43 India), Nepal Health Research Council (Kathmandu, Nepal), Makerere University (Kampala,  
44 Uganda), and the National Council of Science and Technology (Kampala, Uganda) reviewed  
45 and approved the protocols and informed consent procedures for this study.  
46  
47  
48  
49  
50

### 51 **Patient involvement**

The PRIME interventions and evaluations were informed through Theory of Change workshops held in each country [33]. These workshops included national- and district-level representatives, health service providers, and, in some countries, mental health service users.

## RESULTS

The demographic and mental health screening characteristics of participants are detailed in Table 5.

Table 5: Demographic and mental health characteristics for facility detection survey participants, 2013-14

| <b>Country site</b><br>[sample size]     | <b>Ethiopia</b><br>[n=1014] | <b>India</b><br>[n=760]     | <b>Nepal*</b><br>[n=1252]   | <b>South Africa</b><br>[n=1322] | <b>Uganda</b><br>[n=1893]   |
|------------------------------------------|-----------------------------|-----------------------------|-----------------------------|---------------------------------|-----------------------------|
|                                          | Median<br>(IQR) or n<br>(%) | Median<br>(IQR) or n<br>(%) | Median<br>(IQR) or n<br>(%) | Median<br>(IQR) or n<br>(%)     | Median<br>(IQR) or n<br>(%) |
| Age, years                               | 30 (23-45)                  | 37 (27-51)                  | 36 (27-50)                  | 46 (37-56)                      | 28 (22-37)                  |
| Female                                   | 551 (54.3)                  | 386 (50.8)                  | 813 (64.9)                  | 992 (75.0)                      | 1500 (79.2)                 |
| Education                                |                             |                             |                             |                                 |                             |
| Less than primary                        | 692 (68.3)                  | 381 (50.1)                  | 444 (35.5)                  | 308 (23.3)                      | 174 (9.2)                   |
| Primary                                  | 230 (22.7)                  | 186 (24.5)                  | 253 (20.2)                  | 829 (62.7)                      | 1113 (58.8)                 |
| Secondary or more                        | 91 (9.0)                    | 193 (25.4)                  | 555 (44.3)                  | 185 (14.0)                      | 606 (32.0)                  |
| PHQ-9 score                              | 4 (1-7)                     | 6 (4-9)                     | 4 (2-7)                     | 3 (1-6)                         | 2 (1-4)                     |
| PHQ-9 positive**                         | 117 (11.5)                  | 153 (20.1)                  | 186 (14.9)                  | 107 (8.1)                       | 80 (4.2)                    |
| Depression symptoms<br>in past 12 months |                             | 110 (14.5)                  | 174 (13.9)                  | 157 (11.9)                      | 159 (8.4)                   |
| AUDIT score                              | 2 (0-5)                     | 0 (0-0)                     | 0 (0-1)                     | 0 (0-4)                         | 0 (0-0)                     |
| Alcohol abstinent                        | 275 (27.1)                  | 659 (86.7)                  | 849 (67.8)                  | 724 (54.8)                      | 1475 (77.9)                 |
| AUDIT positive**                         | 166 (16.4)                  | 35 (4.6)                    | 92 (7.3)                    | 43 (3.2)                        | 23 (1.2)                    |
| Dependent alcohol<br>use                 | 37 (3.6)                    | 3 (0.4)                     | 32 (2.6)                    | 21 (1.6)                        | 2 (0.1)                     |

\* Excluding 222 patients from 2 clinics

\*\* Using country-specific cut off scores (Table 2)

1  
2  
3 Ages ranged from a median of 28 years in Uganda to 46 years in South Africa. The majority  
4 of participants in all countries were female, from 51% in India to 79% in Uganda. The  
5 proportion of participants who screened positive for depression ranged between 20% in India  
6 to 4.2% in Uganda, for depression symptoms in the past 12 months ranged between 8% in  
7 Uganda to 14% in India, and for AUDIT between 1% in Uganda and 16% in Ethiopia. These  
8 probable cases were asked to complete the Exit interview and/or their clinicians asked to  
9 complete a consultation form. Outcome data were available for 96% of these participants  
10 (from clinical consultation forms or exit questionnaires), though exit questionnaire  
11 completion was lower for depression screen-positive participants in Uganda (48/80, 60%),  
12 and AUD screen-positive participants in South Africa (38/43, 90%) and Uganda (18/23,  
13 78%), respectively. Non-completion was primarily due to participants having to leave the  
14 clinic immediately or the interviewer being unable to locate the participant after their  
15 consultation.  
16  
17  
18  
19  
20  
21  
22  
23

24 The proportions of screen-positive participants who were detected and who started treatment  
25 are presented in Table 6.  
26  
27  
28  
29  
30  
31  
32  
33  
34  
35  
36  
37  
38  
39  
40  
41  
42  
43  
44  
45  
46  
47  
48  
49  
50  
51  
52  
53  
54  
55  
56  
57  
58  
59  
60

Table 6. Detection and treatment among screen-positive adults in PRIME implementation clinics, 2013-2014.

| Country site                             | Ethiopia                | India       | Nepal                   | South Africa          | Uganda               |
|------------------------------------------|-------------------------|-------------|-------------------------|-----------------------|----------------------|
| <b>Depression</b>                        |                         |             |                         |                       |                      |
| Outcome data collected / screen positive | 117/117                 | 153/153     | 179/186                 | 103/107               | 48/80                |
| Detected, n (%; 95% CI)                  | 12/117 (10.3, 5.9-17.2) | 0/153 (0.0) | 21/179 (11.7, 7.8-17.3) | 6/103 (5.8, 2.6-12.4) | 2/48 (4.2, 1.0-15.4) |
| Treatment initiated, n (%; 95% CI)       | 0/117 (0.0)             | 0/153 (0.0) | 1/179 (0.5, 0.0-3.9)    | 0/103 (0.0)           | 2/48 (4.2, 1.0-15.4) |
| <b>Alcohol Use Disorder (AUD)</b>        |                         |             |                         |                       |                      |
| Outcome data collected / screen positive | 166/166                 | 35/35       | 90/92                   | 38/43                 | 18/23                |
| Detected, n (%; 95% CI)                  | 0/166 (0.0)             | 0/35 (0.0)  | 7/90 (7.8, 3.7-15.6)    | 0/38 (0.0)            | 1/18 (5.6, 0.7-32.2) |
| Treatment initiated, n (%; 95% CI)       | 0/116 (0.0)             | 0/35 (0.0)  | 2/90 (2.2, 0.5-8.6)     | 0/38 (0.0)            | 0/18 (0.0)           |

1  
2  
3 Among depression screen-positive participants, detection of depression ranged from 0% in  
4 India to 11.7% in Nepal. Small proportions of screen-positive participants received treatment  
5 (0% in Ethiopia, India and South Africa to 4.2% in Uganda). Among AUD screen-positive  
6 participants, detection of AUD ranged from 0% in Ethiopia and India to 7.8% in Nepal.  
7  
8 Treatment was 0% in all countries aside Nepal, where it was 2.2%.  
9  
10

11 For probable non-cases, detection of depression ranged from 0/557 (0.0%) in India to 3/74  
12 (4.0%) in Nepal, and detection of AUD ranged from 0/557 (0.0%) in India to 2/74 (2.7%) in  
13 Nepal. Treatment was almost entirely absent. (See Table 7)  
14  
15  
16  
17  
18  
19  
20  
21  
22  
23  
24  
25  
26  
27  
28  
29  
30  
31  
32  
33  
34  
35  
36  
37  
38  
39  
40  
41  
42  
43  
44  
45  
46  
47  
48  
49  
50  
51  
52  
53  
54  
55  
56  
57  
58  
59  
60

Table 7. Detection and treatment among probable non-cases in PRIME implementation clinics, 2013-2014.

| <b>Country site (# depression and AUD screen-negative and no depression symptoms in 12 months)</b> | <b>Ethiopia (n=752)</b> | <b>India (n=557)</b> | <b>Nepal (n=74)</b> | <b>South Africa (n=113)</b> | <b>Uganda (n=332)</b> |
|----------------------------------------------------------------------------------------------------|-------------------------|----------------------|---------------------|-----------------------------|-----------------------|
| <b>Depression</b>                                                                                  |                         |                      |                     |                             |                       |
| Detected, n (%)                                                                                    | 16/752 (2.1)            | 0/557 (0.0)          | 3/74 (4.1)          | 4/113 (3.5)                 | 2/332 (0.6)           |
| Treatment initiated, n (%)                                                                         | 0/752 (0.0)             | 0/557 (0.0)          | 0/74 (0.0)          | 3/113 (2.6)                 | 1/332 (0.3)           |
| <b>Alcohol use disorder</b>                                                                        |                         |                      |                     |                             |                       |
| Detected, n (%)                                                                                    | 0/752 (0.0)             | 0/557 (0.0)          | 2/74 (2.7)          | 2/113 (1.8)                 | 1/332 (0.3)           |
| Treatment initiated, n (%)                                                                         | 0/752 (0.0)             | 0/557 (0.0)          | 0/74 (0.0)          | 0/113 (0.0)                 | 1/332 (0.3)           |



## DISCUSSION

This study establishes the magnitude of the detection gap for adults attending primary care in diverse LMIC settings. There were low levels of detection of depression from screen-positive participants in Ethiopia, Nepal, South Africa and Uganda and no detection in India. There was no detection of AUD among screen-positive participants outside Nepal and Uganda. Conversely, there was almost no evidence of mis- or over-diagnosis of depression or AUD among participants who screened negative.

The detection figures observed here are substantially lower than the average figures found by Mitchell et al. for detection of depression (47%) and for AUD (42%) by primary care providers in high income countries.[13,14] As studies of clinical detection in LMIC settings were not available for these meta-analyses, this study fills a key gap in our understanding of the detection gap globally. These findings provide insight into how the population-level treatment gap in LMIC is at least partially attributable to a facility-level detection gap.

While detection levels were low, the facility-level treatment gap approached 100% in most settings. The treatment outcome definitions used here were broad and included provision of advice or referrals to specialist care, both of which clinicians were able to dispense prior to implementation of the PRIME mental health care plans. The first barrier for providing treatment at the health facility is detection, and, as reported above, across all settings detection levels were extremely low. The findings of this study indicate consistent missed opportunities for providing evidence-based care across these diverse LMIC settings. Improving clinical detection and treatment of depression and AUD by primary care providers remains an area where intervention development is required; the PRIME consortium will evaluate its own interventions – the plans for which have described in detail [34–38] - in follow-ups to this report.

The PRIME Facility Detection study uses widely-validated screening tools to identify probable cases. While diagnostic interviews are the gold standard for identifying cases, screening tools are usable by trained interviewers rather than clinicians, and so the methods used here are more easily replicable for monitoring and evaluation activities in other LMIC settings. Our outcome data were collected directly from the participants and clinicians rather than from a health management information system, which is also a replicable monitoring method for LMIC settings.

1  
2  
3 There are several limitations to our study. First, screening tools (PHQ-9 and AUDIT) were  
4 used to identify probable cases of depression and AUD; an unknown number of screen-  
5 positive cases are actually false positive cases. As such it is not appropriate to interpret the  
6 proportions of participants who screen positive as prevalence figures. Further, a 100%  
7 detection figure is not a desirable goal, as it indicates diagnosis among false positive cases.  
8 Screening misclassification is likely to be similar in the follow-up round, and so the  
9 denominators for detection and treatment are equally biased across rounds and allows a valid  
10 comparison across time to be made. Second, non-random sampling was used to select some  
11 patients for interviews. As we plan to use the same sampling plan within each country, again,  
12 the selection bias is likely similar between rounds and valid comparisons of change are  
13 possible. In contrast the loss to follow-up for screen-positive participants in Nepal, South  
14 Africa and Uganda, could result in biased findings, as the characteristics of lost participants is  
15 unknown.

16  
17  
18  
19  
20  
21  
22  
23  
24  
25 A third limitation concerns the outcome definitions for detection and treatment. Given the  
26 limitations of using patient- and clinician-reported data, with issues around recall and  
27 specificity, we opted to use extremely sensitive yet non-specific thresholds of evidence for  
28 coding detection or treatment as having occurred. The detection and treatment figures  
29 reported here should therefore be regarded as the upper bound of possibility: some of those  
30 coded as having been detected with depression may have other mental health disorders, and  
31 some of those coded as having treatment may not have what is considered to be minimally-  
32 adequate evidence-based care. Again, the bias due to these misclassifications will be equal in  
33 the follow up round. Use of cross-country coding criteria facilitates comparisons across  
34 diverse settings, and in future reports each country can use these criteria and/or develop their  
35 own more locally-appropriate and specific criteria. This process has been completed in Sodo  
36 District, Ethiopia, where detection outcomes have been reported separately for using specific  
37 criteria for depression and non-specific criteria for common mental disorder.[39]

38  
39  
40  
41  
42  
43  
44  
45  
46  
47 We plan to repeat this survey in each of the implementation sites. By comparing the baseline  
48 versus follow-up figures within each country, we will be able to determine whether the level  
49 of detection and level of initiation of evidence-based treatment for depression and for AUD  
50 has increased as a result of implementing mental health care plans. We will also be able to  
51 assess whether the improved detection and improved treatment provision is equitable by age,  
52 sex and other socio-economic factors. With the help of Theory of Change framework and  
53 process evaluation data collected over the implementation phase,[17] we will try to explain  
54  
55  
56  
57  
58  
59  
60

1  
2  
3 the reasons for improvement/non-improvement of detection and initiation of treatment for  
4 depression and for AUD, along identifying with the factors relating to detection.  
5

6  
7 Further research can identify the patient-, clinician- and system-level characteristics  
8 associated with detection, as a means of further refining interventions. Some of these  
9 characteristics are already potential targets for intervention, and have been identified in  
10 previous studies: On the patient level, those who have higher level of perceived need[40] and  
11 lower levels of internalized stigma[13,14] are more likely to receive a diagnosis. On the  
12 clinician level, detection improves with longer consultation time,[41,42] adequate training, a  
13 stronger therapeutic alliance,[13] and with contractual incentives.[43] And on the health-  
14 system level, detection is likely to improve with the availability of medications and health  
15 providers at PHC level who have the authority to prescribe psychotropic medication, as well  
16 as referral pathways to counsellors. Also important are buy-in and support from leadership  
17 who give priority to mental health[1], governance and supervisory structures to develop and  
18 execute standardized protocols,[44] and a functional health management information  
19 system[45] to monitor and feed back on clinical activity. A combination of these patient-,  
20 clinician- and system- level characteristics may explain some of the substantially lower  
21 detection figures for depression and AUD found here from our LMIC settings compared to  
22 those found in meta-analyses by Mitchell et al. in HIC settings.  
23  
24  
25  
26  
27  
28  
29  
30  
31  
32

### 33 **Conclusion**

34  
35  
36 The findings of this study suggest large detection and treatment gaps for adult primary care  
37 patients, which are likely contributors to the population-level mental health treatment gap in  
38 LMIC. Primary care centres remain unfulfilled intervention points for reducing the  
39 population-level burden of disease in LMIC.  
40  
41  
42  
43  
44  
45  
46  
47  
48  
49  
50  
51  
52  
53  
54  
55  
56  
57  
58  
59  
60

## Funding

This study is an output of the PRogramme for Improving Mental health carE (PRIME). The material has been funded by UKaid from the UK Government (Department of International Development), however the views expressed do not necessarily reflect the UK Government's official policies. The funders had no role in study design, data collection and analysis, decision to publish, or preparation of the manuscript.

## Competing interests

None declared

## Authors contributions

**Conceptualization** SDR, MJ, IP, FK, CL, AF, RS

**Design** SDR, TR, GM, NPL, AB, IP, FK, CL, AF, RS

**Data acquisition** TR, GM, VM, SS, NPL, OS, JS

**Data analysis** SDR

**Data interpretation** SDR, CL, RS

**Drafting** SDR, TR, CL, RS

**Critical revision** GM, VM, SS, NPL, OS, JS, MJ, AB, IP, FK, CL, AF, RS

**Final approval** SDR, TR, GM, VM, SS, NPL, OS, JS, MJ, AB, IP, FK, CL, AF, RS

**Accountability** SDR, TR, GM, VM, SS, NPL, OS, JS, MJ, AB, IP, FK, CL, AF, RS

**Data sharing statement:** Statistical code (Stata) is available as supplementary material. While we cannot make the dataset publicly available, we will consider all request to provide a minimal dataset to interested researchers via the PRIME consortium Expression of interest form here: <http://www.prime.uct.ac.za/contact-us>.

## Acknowledgments

Thanks to Katamba Mutyaba, Nabukko Sarah, Kirangi Juliet, Kasiiri Joweria, Namwase Suzan and Mwebesa Julius in Uganda; Tasneem Kathree, Palesa Mothibedi, Primrose Mathakga and Deanna Carter in South Africa; Anup Adhikari in Nepal; and the study

1  
2  
3  
4  
5  
6  
7  
8  
9  
10  
11  
12  
13  
14  
15  
16  
17  
18  
19  
20  
21  
22  
23  
24  
25  
26  
27  
28  
29  
30  
31  
32  
33  
34  
35  
36  
37  
38  
39  
40  
41  
42  
43  
44  
45  
46  
47  
48  
49  
50  
51  
52  
53  
54  
55  
56  
57  
58  
59  
60

participants.

For peer review only

## REFERENCES

- 1 Patel V, Chisholm D, Parikh R, *et al.* Addressing the burden of mental, neurological, and substance use disorders: key messages from Disease Control Priorities , 3rd edition. *The Lancet* 2016;**387**:1672–85. doi:10.1016/S0140-6736(15)00390-6
- 2 Liu NH, Daumit GL, Dua T, *et al.* Excess mortality in persons with severe mental disorders: a multilevel intervention framework and priorities for clinical practice, policy and research agendas. *World Psychiatry* 2017;**16**:30–40. doi:10.1002/wps.20384
- 3 Bloom D, Cafiero E, Jané-Llopis E, *et al.* The Global Economic Burden of Noncommunicable Diseases. Geneva: : World Economic Forum 2011. www.weforum.org/EconomicsOfNCD
- 4 Whiteford HA, Degenhardt L, Rehm J, *et al.* Global burden of disease attributable to mental and substance use disorders: findings from the Global Burden of Disease Study 2010. *The Lancet* 2013;**382**:1575–1586.
- 5 Rathod SD, De Silva MJ, Ssebunnya J, *et al.* Treatment Contact Coverage for Probable Depressive and Probable Alcohol Use Disorders in Four Low- and Middle-Income Country Districts: The PRIME Cross-Sectional Community Surveys. *PLoS One* 2016;**11**:e0162038. doi:10.1371/journal.pone.0162038
- 6 Dua T, Barbui C, Clark N, *et al.* Evidence-Based Guidelines for Mental, Neurological, and Substance Use Disorders in Low- and Middle-Income Countries: Summary of WHO Recommendations. *PLoS Med* 2011;**8**:e1001122. doi:10.1371/journal.pmed.1001122
- 7 World Health Organization. mhGAP Intervention Guide - Version 2.0 for mental, neurological and substance use disorders in non-specialized health settings. Geneva: : World Health Organization 2016.
- 8 Regier DA, Narrow WE, Rae DS, *et al.* The de facto US mental and addictive disorders service system. Epidemiologic catchment area prospective 1-year prevalence rates of disorders and services. *Arch Gen Psychiatry* 1993;**50**:85–94.
- 9 Simon GE, VonKorff M. Recognition, management, and outcomes of depression in primary care. *Arch Fam Med* 1995;**4**:99–105.
- 10 Prince M, Patel V, Saxena S, *et al.* No health without mental health. *The Lancet* 2007;**370**:859–77. doi:10.1016/S0140-6736(07)61238-0
- 11 Moussavi S, Chatterji S, Verdes E, *et al.* Depression, chronic diseases, and decrements in health: results from the World Health Surveys. *The Lancet* 2007;**370**:851–8. doi:10.1016/S0140-6736(07)61415-9
- 12 Patel V, Belkin GS, Chockalingam A, *et al.* Grand Challenges: Integrating Mental Health Services into Priority Health Care Platforms. *PLoS Med* 2013;**10**:e1001448. doi:10.1371/journal.pmed.1001448
- 13 Mitchell AJ, Vaze A, Rao S. Clinical diagnosis of depression in primary care: a meta-analysis. *The Lancet* 2009;**374**:609–19.

- 1  
2  
3 14 Mitchell AJ, Meader N, Bird V, *et al.* Clinical recognition and recording of alcohol  
4 disorders by clinicians in primary and secondary care: meta-analysis. *Br J Psychiatry*  
5 2012;**201**:93–100. doi:10.1192/bjp.bp.110.091199  
6  
7 15 Lund C, Tomlinson M, De Silva M, *et al.* PRIME: A Programme to Reduce the  
8 Treatment Gap for Mental Disorders in Five Low- and Middle-Income Countries. *PLoS*  
9 *Med* 2012;**9**:e1001359. doi:10.1371/journal.pmed.1001359  
10  
11 16 Hanlon C, Luitel NP, Kathree T, *et al.* Challenges and Opportunities for Implementing  
12 Integrated Mental Health Care: A District Level Situation Analysis from Five Low- and  
13 Middle-Income Countries. *PLoS ONE* 2014;**9**:e88437. doi:10.1371/journal.pone.0088437  
14  
15 17 De Silva MJ, Rathod SD, Hanlon C, *et al.* Evaluation of district mental healthcare plans:  
16 the PRIME consortium methodology. *Br J Psychiatry* 2015;**208**:s63–70.  
17 doi:10.1192/bjp.bp.114.153858  
18  
19 18 Babor TF, Higgins-Biddle JC, Saunders JB, *et al.* AUDIT: The Alcohol Use Disorders  
20 Identification Test Guidelines for Use in Primary Care. Geneva, Switzerland: : World  
21 Health Organization 2001.  
22  
23 19 Robins LN, Wing MD, Helzer MD, *et al.* The composite international diagnostic  
24 interview. *Arch Gen Psychiatry* 1988;**45**:1069–1077.  
25  
26 20 Clement S, Brohan E, Jeffery D, *et al.* Development and psychometric properties the  
27 Barriers to Access to Care Evaluation scale (BACE) related to people with mental ill  
28 health. *BMC Psychiatry* 2012;**12**:36. doi:10.1186/1471-244X-12-36  
29  
30 21 Kroenke K, Spitzer RL, Williams JBW. The PHQ-9: Validity of a brief depression  
31 severity measure. *J Gen Intern Med* 2001;**16**:606–13. doi:10.1046/j.1525-  
32 1497.2001.016009606.x  
33  
34 22 Üstün TB, Kostanjsek N, Chatterji S, *et al.*, editors. *Measuring health and disability:*  
35 *manual for WHO Disability Assessment Schedule WHODAS 2.0.* Geneva: : World Health  
36 Organization 2010.  
37  
38 23 Hanlon C, Medhin G, Selamu M, *et al.* Validity of brief screening questionnaires to  
39 detect depression in primary care in Ethiopia. *J Affect Disord* 2015;**186**:32–9.  
40 doi:10.1016/j.jad.2015.07.015  
41  
42 24 Kohrt BA, Luitel NP, Acharya P, *et al.* Detection of depression in low resource settings:  
43 validation of the Patient Health Questionnaire (PHQ-9) and cultural concepts of distress  
44 in Nepal. *BMC Psychiatry* 2016;**16**. doi:10.1186/s12888-016-0768-y  
45  
46 25 Patel V, Araya R, Chowdhary N, *et al.* Detecting common mental disorders in primary  
47 care in India: a comparison of five screening questionnaires. *Psychol Med* 2008;**38**.  
48 doi:10.1017/S0033291707002334  
49  
50 26 Bhana A, Rathod SD, Selohilwe O, *et al.* The validity of the Patient Health Questionnaire  
51 for screening depression in chronic care patients in primary health care in South Africa.  
52 *BMC Psychiatry* 2015;**15**:118. doi:10.1186/s12888-015-0503-0  
53  
54  
55  
56  
57  
58  
59



- 1  
2  
3 27 Nakku E, Rathod S, Kizza D, *et al.* Validity and diagnostic accuracy of the Luganda  
4 version of the 9-Item and 2-Item Patient Health Questionnaire for detecting major  
5 depressive disorder in rural Uganda. *Glob Ment Health* Published Online First: 2016.  
6 doi:10.1017/gmh.2026.14  
7
- 8 28 Nayak MB, Bond JC, Cherpitel C, *et al.* Detecting Alcohol-Related Problems in  
9 Developing Countries: A Comparison of 2 Screening Measures in India. *Alcohol Clin*  
10 *Exp Res* 2009;**33**:2057–66. doi:10.1111/j.1530-0277.2009.01045.x  
11
- 12 29 Pradhan B, Chappuis F, Baral D, *et al.* The alcohol use disorders identification test  
13 (AUDIT): validation of a Nepali version for the detection of alcohol use disorders and  
14 hazardous drinking in medical settings. *Subst Abuse Treat Prev Policy* 2012;**7**:42.  
15 doi:10.1186/1747-597X-7-42  
16
- 17 30 Myer L, Smit J, Roux LL, *et al.* Common Mental Disorders among HIV-Infected  
18 Individuals in South Africa: Prevalence, Predictors, and Validation of Brief Psychiatric  
19 Rating Scales. *AIDS Patient Care STDs* 2008;**22**:147–58. doi:10.1089/apc.2007.0102  
20
- 21 31 Saunders JB, Aasland OG, Babor TF, *et al.* Development of the Alcohol Use Disorders  
22 Identification Test (AUDIT): WHO Collaborative Project on Early Detection of Persons  
23 with Harmful Alcohol Consumption-II. *Addiction* 1993;**88**:791–804. doi:10.1111/j.1360-  
24 0443.1993.tb02093.x  
25
- 26 32 Chishinga N, Kinyanda E, Weiss HA, *et al.* Validation of brief screening tools for  
27 depressive and alcohol use disorders among TB and HIV patients in primary care in  
28 Zambia. *BMC Psychiatry* 2011;**11**. doi:10.1186/1471-244X-11-75  
29
- 30 33 Breuer E, De Silva MJ, Shidaye R, *et al.* Planning and evaluating mental health services  
31 in low- and middle-income countries using theory of change. *Br J Psychiatry* Published  
32 Online First: 7 October 2015. doi:10.1192/bjp.bp.114.153841  
33
- 34 34 Fekadu A, Hanlon C, Medhin G, *et al.* Development of a scalable mental healthcare plan  
35 for a rural district in Ethiopia. *Br J Psychiatry* 2016;**208**:s4–12.  
36 doi:10.1192/bjp.bp.114.153676  
37
- 38 35 Shidhaye R, Shrivastava S, Murhar V, *et al.* Development and piloting of a plan for  
39 integrating mental health in primary care in Sehore district, Madhya Pradesh, India. *Br J*  
40 *Psychiatry* 2016;**208**:s13–20. doi:10.1192/bjp.bp.114.153700  
41
- 42 36 Jordans MJD, Luitel NP, Pokhrel P, *et al.* Development and pilot testing of a mental  
43 healthcare plan in Nepal. *Br J Psychiatry* 2016;**208**:s21–8.  
44 doi:10.1192/bjp.bp.114.153718  
45
- 46 37 Petersen I, Fairall L, Bhana A, *et al.* Integrating mental health into chronic care in South  
47 Africa: the development of a district mental healthcare plan. *Br J Psychiatry*  
48 2016;**208**:s29–39. doi:10.1192/bjp.bp.114.153726  
49
- 50 38 Kigozi FN, Kizza D, Nakku J, *et al.* Development of a district mental healthcare plan in  
51 Uganda. *Br J Psychiatry* 2016;**208**:s40–6. doi:10.1192/bjp.bp.114.153742  
52
- 53 39 Fekadu A, Medhin G, Selamu M, *et al.* Recognition of depression by primary care  
54 clinicians in rural Ethiopia. *BMC Fam Pract* 2017;**18**. doi:10.1186/s12875-017-0628-y  
55  
56  
57  
58  
59



- 1  
2  
3 40 Young AS, Klap R, Sherbourne CD, *et al.* The Quality of Care for Depressive and  
4 Anxiety Disorders in the United States. *Arch Gen Psychiatry* 2001;**58**:55.  
5 doi:10.1001/archpsyc.58.1.55  
6  
7 41 Hutton C, Gunn J. Do longer consultations improve the management of psychological  
8 problems in general practice? A systematic literature review. *BMC Health Serv Res*  
9 2007;**7**. doi:10.1186/1472-6963-7-71  
10  
11 42 Irving G, Neves AL, Dambha-Miller H, *et al.* International variations in primary care  
12 physician consultation time: a systematic review of 67 countries. *BMJ Open*  
13 2017;**7**:e017902. doi:10.1136/bmjopen-2017-017902  
14  
15 43 van Dijk CE, Verheij RA, Spreeuwenberg P, *et al.* Impact of remuneration on guideline  
16 adherence: Empirical evidence in general practice. *Scand J Prim Health Care*  
17 2013;**31**:56–63. doi:10.3109/02813432.2012.757078  
18  
19 44 Petersen I, Marais D, Abdulmalik J, *et al.* Strengthening mental health system  
20 governance in six low- and middle-income countries in Africa and South Asia:  
21 challenges, needs and potential strategies. *Health Policy Plan* 2017;**32**:699–709.  
22 doi:10.1093/heapol/czx014  
23  
24 45 Upadhaya N, Jordans MJD, Abdulmalik J, *et al.* Information systems for mental health in  
25 six low and middle income countries: cross country situation analysis. *Int J Ment Health*  
26 *Syst* 2016;**10**. doi:10.1186/s13033-016-0094-2  
27  
28  
29  
30  
31  
32  
33  
34  
35  
36  
37  
38  
39  
40  
41  
42  
43  
44  
45  
46  
47  
48  
49  
50  
51  
52  
53  
54  
55  
56  
57  
58  
59  
60

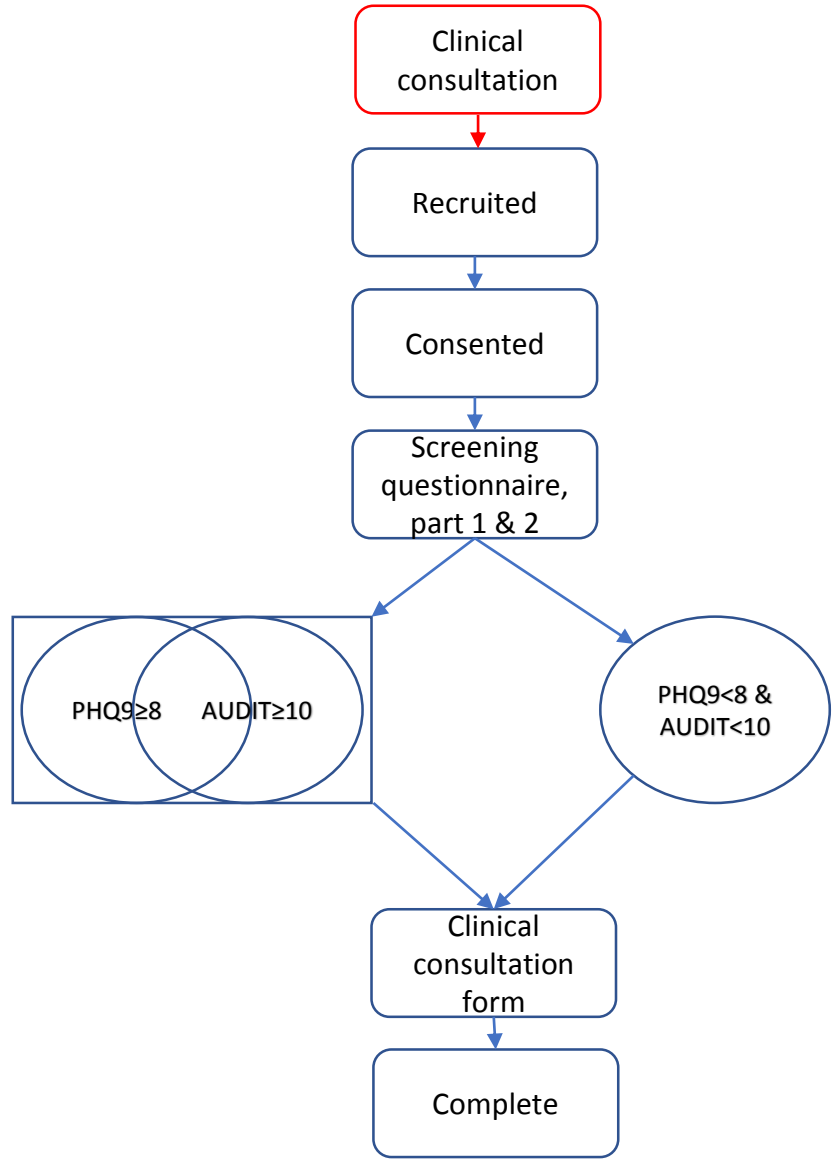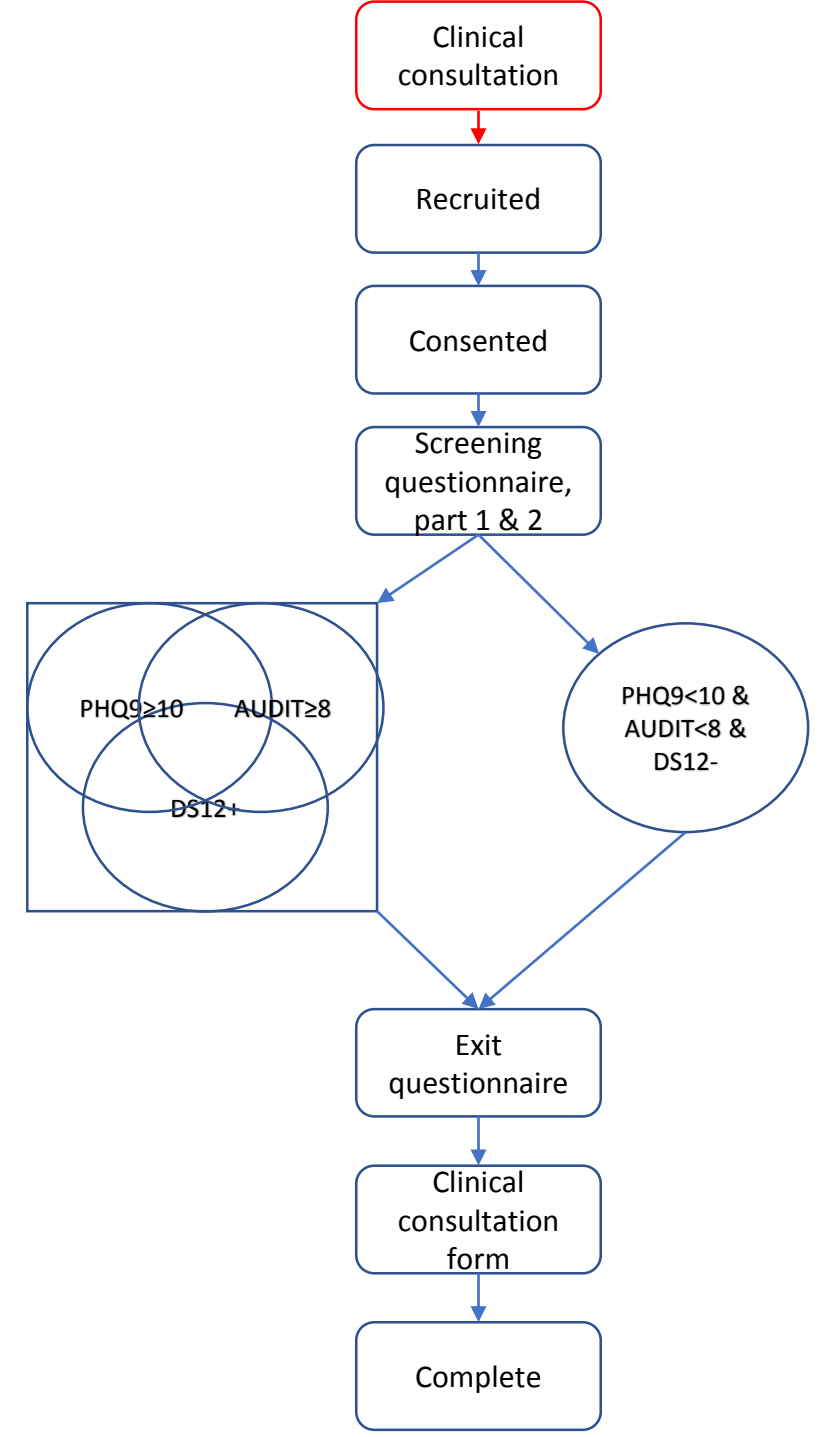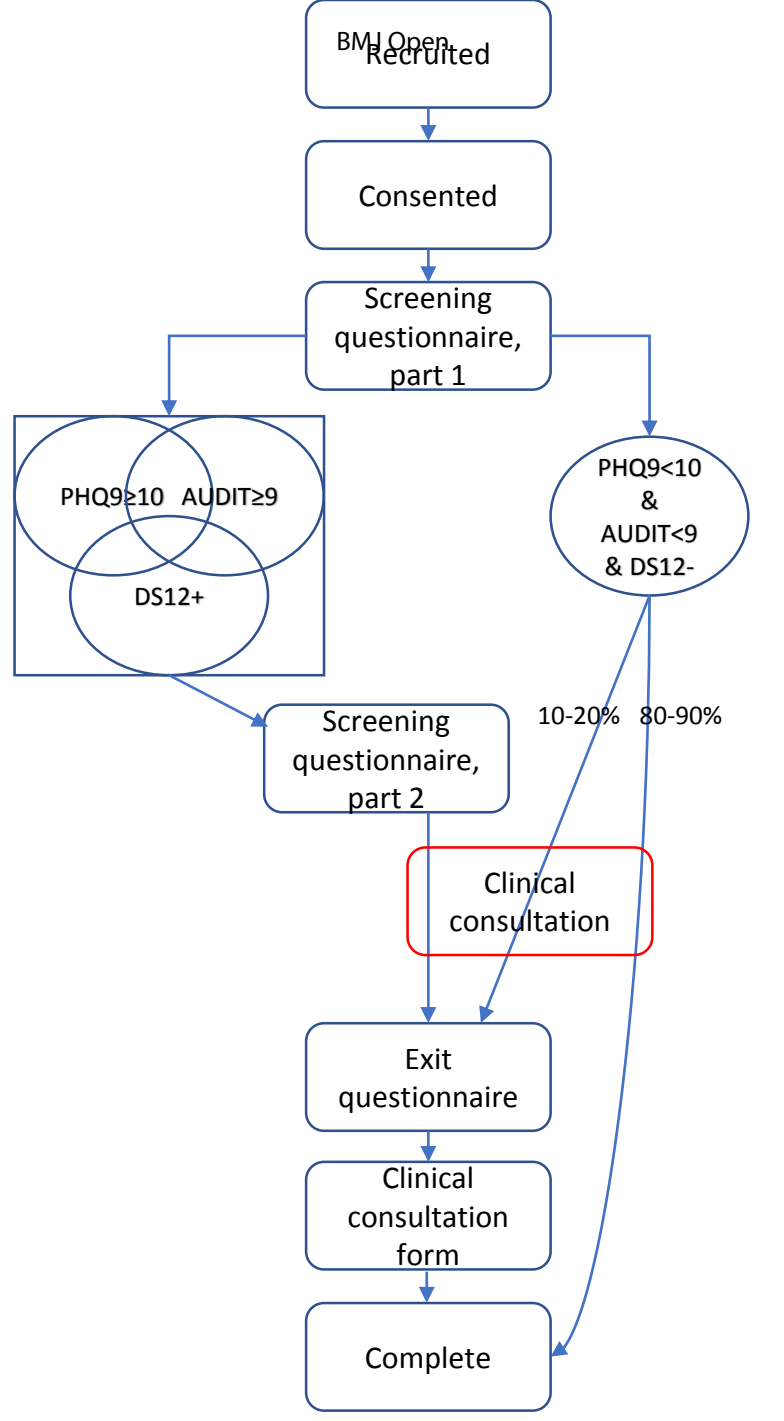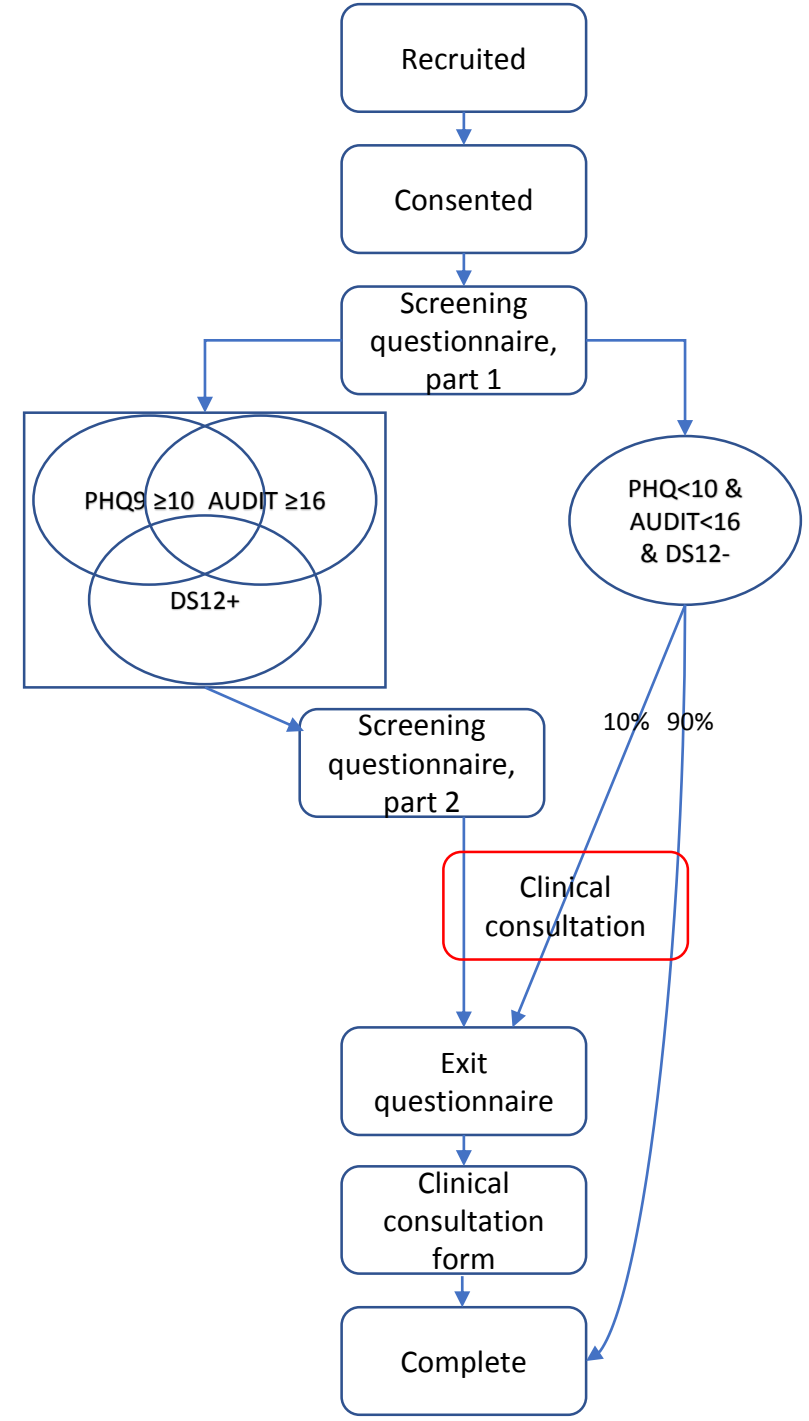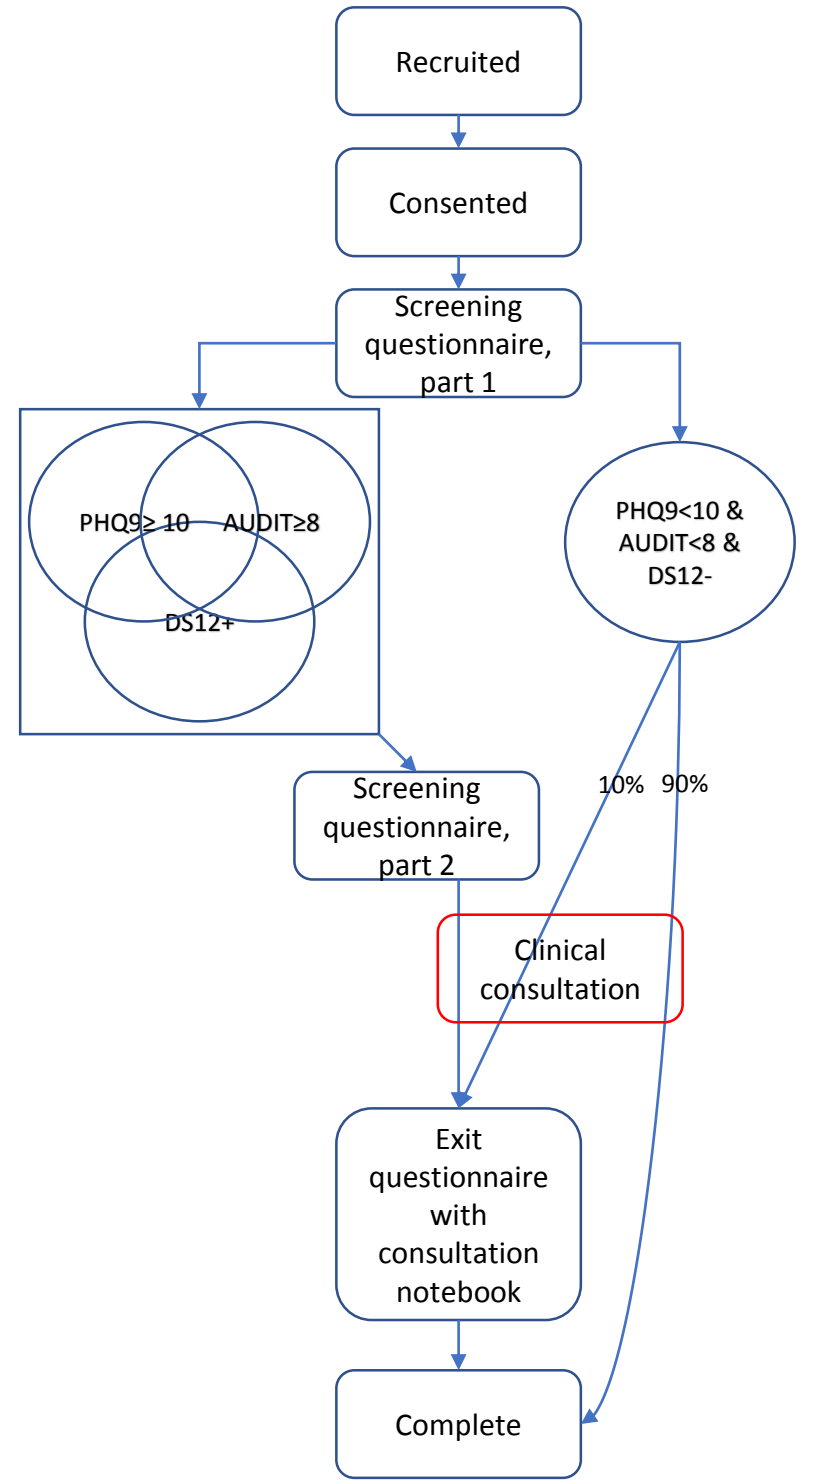

1  
2  
3  
4  
5  
6  
7  
8  
9  
10  
11  
12  
13  
14  
15  
16  
17  
18  
19  
20  
21  
22  
23  
24  
25  
26  
27  
28  
29  
30  
31  
32  
33  
34  
35  
36  
37  
38  
39  
40  
41  
42  
43  
44  
45  
46

```
1
2
3 *****
4 *** Baseline FDS & Methods ***
5 *****
6 use "C:\PRIME\FDS\UCT\FDS.dta" if round==1, clear
7     keep country cname idate _screenexit _dxtx ///
8         age sex educ_3c emp ///
9         phq? totalphq phqpos dephis aud? aud10 totalaud audpos aud_5c ///
10        detect_* treat_* medname*
11
12        drop if mi(sex)
13        table country, c(N idate min idate max idate)
14
15        bysort country: alpha phq?, item
16        mvencode aud1-aud10, mv(.=0) over
17        bysort country: alpha aud1-aud10, item
18
19 *****
20 *** TABLE 1 ***
21 *****
22     * Number of FDS clinics per country
23     bysort country: distinct cname
24     * Drop Nepal clinics which got training before baseline
25     drop if cname==36 | cname==37
26
27 *****
28 *** TABLE 2 ***
29 *****
30     * Age
31     tabstat age, by(country) col(stat) stat(n p50 p25 p75) f(%9.3g)
32     * % Female
33     tab sex country, col
34     * Education
35     tab educ_3c country, col
36     * Employment - propose using unemployed/non-income/income
37     * tab emp country, col nolabel
38
39
40
41
42
43
44
45
46
```

```
1
2
3 *****
4 *** TABLE 6 ***
5 *****
6 * DEPRESSION
7 * Median PHQ9 score
8 tabstat totalphq, by(country) col(stat) stat(n p50 p25 p75) f(%9.3g)
9 * PHQ9+ screening cut off score
10 table country phqpos, c(min totalphq max totalphq)
11 * PHQ9+ proportion
12 table country, c(n phqpos sum phqpos mean phqpos) f(%9.3g)
13 tab country dephis, row
14 * PHQ9+ proportion and 95% CI
15 * prop phqpos, over(country)
16 * Retained for exit interview
17 tab country _screenexit if phqpos, m
18 * Dx Tx for PHQ9+
19 foreach var of varlist detect_dd treat_dd {
20     tab country `var' if phqpos==1 & _screenexit!=1, row
21     prop `var' if phqpos==1 & _screenexit!=1, over(country)
22 }
23 * ALCOHOL
24 * Mean AUDIT
25 tabstat totalaud, by(country) col(stat) stat(n p50 p25 p75) f(%9.3g)
26 * AUDIT cut off score
27 table country audpos, c(min totalaud max totalaud)
28 * AUDIT+ proportion
29 table country, c(n audpos sum audpos mean audpos) f(%9.3g)
30 * Abstinent and dependent proportions
31 tab aud_5c country, col
32 * AUDIT+ proportion and 95% CI
33 * prop audpos, over(country)
34 * Retained for exit interview
35 tab country _screenexit if audpos, m
36 * Dx Tx for AUDIT+
37 table country if audpos==1 & _screenexit!=1, c(freq sum detect_aud mean detect_aud sum treat_aud mean treat_aud) f(%9.3g)
38 prop detect_aud treat_aud if audpos==1 & _screenexit!=1, over(country)
39
40
41
42
43
44
45
46
```

```
1
2
3 *****
4 *** TABLE 7 ***
5 *****
6     * Screen negatives
7     mrtab phqpos dephis audpos, by(country) incl
8     foreach var of varlist detect_dd treat_dd detect_aud treat_aud {
9         tab country `var' if phqpos!=1 & audpos!=1 & dephis!=1, row
10        }
11
12
13
14
15
16
17
18
19
20
21
22
23
24
25
26
27
28
29
30
31
32
33
34
35
36
37
38
39
40
41
42
43
44
45
46
```

For peer review only

**STROBE 2007 (v4) Statement—Checklist of items that should be included in reports of *cross-sectional studies***

| Section/Topic                | Item # | Recommendation                                                                                                                                                                       | Reported on page # |
|------------------------------|--------|--------------------------------------------------------------------------------------------------------------------------------------------------------------------------------------|--------------------|
| Title and abstract           | 1      | (a) Indicate the study's design with a commonly used term in the title or the abstract                                                                                               | 1                  |
|                              |        | (b) Provide in the abstract an informative and balanced summary of what was done and what was found                                                                                  | 3                  |
| <b>Introduction</b>          |        |                                                                                                                                                                                      |                    |
| Background/rationale         | 2      | Explain the scientific background and rationale for the investigation being reported                                                                                                 | 5                  |
| Objectives                   | 3      | State specific objectives, including any prespecified hypotheses                                                                                                                     | 5                  |
| <b>Methods</b>               |        |                                                                                                                                                                                      |                    |
| Study design                 | 4      | Present key elements of study design early in the paper                                                                                                                              | 6                  |
| Setting                      | 5      | Describe the setting, locations, and relevant dates, including periods of recruitment, exposure, follow-up, and data collection                                                      | 6                  |
| Participants                 | 6      | (a) Give the eligibility criteria, and the sources and methods of selection of participants                                                                                          | 11                 |
| Variables                    | 7      | Clearly define all outcomes, exposures, predictors, potential confounders, and effect modifiers. Give diagnostic criteria, if applicable                                             | 15                 |
| Data sources/<br>measurement | 8*     | For each variable of interest, give sources of data and details of methods of assessment (measurement). Describe comparability of assessment methods if there is more than one group | 11                 |
| Bias                         | 9      | Describe any efforts to address potential sources of bias                                                                                                                            |                    |
| Study size                   | 10     | Explain how the study size was arrived at                                                                                                                                            | 8                  |
| Quantitative variables       | 11     | Explain how quantitative variables were handled in the analyses. If applicable, describe which groupings were chosen and why                                                         | 16                 |
| Statistical methods          | 12     | (a) Describe all statistical methods, including those used to control for confounding                                                                                                | 16                 |
|                              |        | (b) Describe any methods used to examine subgroups and interactions                                                                                                                  |                    |
|                              |        | (c) Explain how missing data were addressed                                                                                                                                          | 16                 |
|                              |        | (d) If applicable, describe analytical methods taking account of sampling strategy                                                                                                   |                    |
|                              |        | (e) Describe any sensitivity analyses                                                                                                                                                |                    |
| <b>Results</b>               |        |                                                                                                                                                                                      |                    |

|                          |     |                                                                                                                                                                                                              |          |
|--------------------------|-----|--------------------------------------------------------------------------------------------------------------------------------------------------------------------------------------------------------------|----------|
| Participants             | 13* | (a) Report numbers of individuals at each stage of study—eg numbers potentially eligible, examined for eligibility, confirmed eligible, included in the study, completing follow-up, and analysed            | 19       |
|                          |     | (b) Give reasons for non-participation at each stage                                                                                                                                                         | 18       |
|                          |     | (c) Consider use of a flow diagram                                                                                                                                                                           | Figure 1 |
| Descriptive data         | 14* | (a) Give characteristics of study participants (eg demographic, clinical, social) and information on exposures and potential confounders                                                                     | 17       |
|                          |     | (b) Indicate number of participants with missing data for each variable of interest                                                                                                                          | 18       |
| Outcome data             | 15* | Report numbers of outcome events or summary measures                                                                                                                                                         | 19       |
| Main results             | 16  | (a) Give unadjusted estimates and, if applicable, confounder-adjusted estimates and their precision (eg, 95% confidence interval). Make clear which confounders were adjusted for and why they were included | 19       |
|                          |     | (b) Report category boundaries when continuous variables were categorized                                                                                                                                    |          |
|                          |     | (c) If relevant, consider translating estimates of relative risk into absolute risk for a meaningful time period                                                                                             |          |
| Other analyses           | 17  | Report other analyses done—eg analyses of subgroups and interactions, and sensitivity analyses                                                                                                               |          |
| <b>Discussion</b>        |     |                                                                                                                                                                                                              |          |
| Key results              | 18  | Summarise key results with reference to study objectives                                                                                                                                                     | 22       |
| Limitations              | 19  | Discuss limitations of the study, taking into account sources of potential bias or imprecision. Discuss both direction and magnitude of any potential bias                                                   | 23       |
| Interpretation           | 20  | Give a cautious overall interpretation of results considering objectives, limitations, multiplicity of analyses, results from similar studies, and other relevant evidence                                   | 22       |
| Generalisability         | 21  | Discuss the generalisability (external validity) of the study results                                                                                                                                        | 22       |
| <b>Other information</b> |     |                                                                                                                                                                                                              |          |
| Funding                  | 22  | Give the source of funding and the role of the funders for the present study and, if applicable, for the original study on which the present article is based                                                | 24       |

\*Give information separately for cases and controls in case-control studies and, if applicable, for exposed and unexposed groups in cohort and cross-sectional studies.

**Note:** An Explanation and Elaboration article discusses each checklist item and gives methodological background and published examples of transparent reporting. The STROBE checklist is best used in conjunction with this article (freely available on the Web sites of PLoS Medicine at <http://www.plosmedicine.org/>, Annals of Internal Medicine at <http://www.annals.org/>, and Epidemiology at <http://www.epidem.com/>). Information on the STROBE Initiative is available at [www.strobe-statement.org](http://www.strobe-statement.org).

# BMJ Open

## Detection and treatment initiation for depression and alcohol use disorders: facility-based cross-sectional studies in five low- and middle-income country districts

|                                 |                                                                                                                                                                                                                                                                                                                                                                                                                                                                                                                                                                                                                                                                                                                                                                                                                                                                                                                                                                                                                                                                                                                                                                                                                                                                                                                                                                                                                                                                                                                                                                                                                                                                                                                                                                                                                                                                                   |
|---------------------------------|-----------------------------------------------------------------------------------------------------------------------------------------------------------------------------------------------------------------------------------------------------------------------------------------------------------------------------------------------------------------------------------------------------------------------------------------------------------------------------------------------------------------------------------------------------------------------------------------------------------------------------------------------------------------------------------------------------------------------------------------------------------------------------------------------------------------------------------------------------------------------------------------------------------------------------------------------------------------------------------------------------------------------------------------------------------------------------------------------------------------------------------------------------------------------------------------------------------------------------------------------------------------------------------------------------------------------------------------------------------------------------------------------------------------------------------------------------------------------------------------------------------------------------------------------------------------------------------------------------------------------------------------------------------------------------------------------------------------------------------------------------------------------------------------------------------------------------------------------------------------------------------|
| Journal:                        | <i>BMJ Open</i>                                                                                                                                                                                                                                                                                                                                                                                                                                                                                                                                                                                                                                                                                                                                                                                                                                                                                                                                                                                                                                                                                                                                                                                                                                                                                                                                                                                                                                                                                                                                                                                                                                                                                                                                                                                                                                                                   |
| Manuscript ID                   | bmjopen-2018-023421.R1                                                                                                                                                                                                                                                                                                                                                                                                                                                                                                                                                                                                                                                                                                                                                                                                                                                                                                                                                                                                                                                                                                                                                                                                                                                                                                                                                                                                                                                                                                                                                                                                                                                                                                                                                                                                                                                            |
| Article Type:                   | Research                                                                                                                                                                                                                                                                                                                                                                                                                                                                                                                                                                                                                                                                                                                                                                                                                                                                                                                                                                                                                                                                                                                                                                                                                                                                                                                                                                                                                                                                                                                                                                                                                                                                                                                                                                                                                                                                          |
| Date Submitted by the Author:   | 01-Aug-2018                                                                                                                                                                                                                                                                                                                                                                                                                                                                                                                                                                                                                                                                                                                                                                                                                                                                                                                                                                                                                                                                                                                                                                                                                                                                                                                                                                                                                                                                                                                                                                                                                                                                                                                                                                                                                                                                       |
| Complete List of Authors:       | <p>Rathod, Sujit; London School of Hygiene and Tropical Medicine, Department of Population Health</p> <p>Roberts, Tessa; London School of Hygiene and Tropical Medicine, Population Health, Faculty of Epidemiology and Population Health; King's College London, Health Services and Population Research Department</p> <p>Medhin, Girmay; Addis Ababa University, Akililu Lemma Institute of Pathology</p> <p>Murhar, Vaibhav; The Centre for Chronic Conditions and Injuries, Public Health foundation of India</p> <p>Samudre, Sandesh; The Centre for Chronic Conditions and Injuries, Public Health foundation of India; King's College London, Health Services and Population Research Department</p> <p>Luitel, Nagendra; Transcultural Psychosocial Organization (TPO) Nepal</p> <p>Selohilwe, One; University of KwaZulu-Natal College of Health Sciences, Centre for Rural Health</p> <p>Ssebunnya, Joshua; Butabika National Referral and Teaching Mental Hospital, Kampala</p> <p>Jordans, MJ; King's College London,</p> <p>Bhana, Arvin; University of KwaZulu-Natal, School of Applied Human Sciences</p> <p>Petersen, I.; University of KwaZulu-Natal College of Health Sciences, Centre for Rural Health</p> <p>Kigozi, Fred; Butabika National Referral and Teaching Mental Hospital, Kampala</p> <p>Nakku, Juliet; Butabika National Referral and Teaching Mental Hospital, Kampala</p> <p>Lund, Crick; King's College London, Centre for Global Mental Health; University of Cape Town , Alan J Flisher Centre for Public Mental Health</p> <p>Fekadu, Abebaw; Addis Ababa University, Centre for Innovative Drug Development and Therapeutic Trials for Africa; Brighton and Sussex Medical School, Global Health &amp; Infection Department</p> <p>Shidhaye, Rahul; Centre for Mental Health, Public health foundation of India; Maastricht University</p> |
| <b>Primary Subject Heading</b>: | Mental health                                                                                                                                                                                                                                                                                                                                                                                                                                                                                                                                                                                                                                                                                                                                                                                                                                                                                                                                                                                                                                                                                                                                                                                                                                                                                                                                                                                                                                                                                                                                                                                                                                                                                                                                                                                                                                                                     |
| Secondary Subject Heading:      | Diagnostics, Epidemiology, Global health, Health services research, Medical management                                                                                                                                                                                                                                                                                                                                                                                                                                                                                                                                                                                                                                                                                                                                                                                                                                                                                                                                                                                                                                                                                                                                                                                                                                                                                                                                                                                                                                                                                                                                                                                                                                                                                                                                                                                            |



1  
2  
3  
4  
5  
6  
7  
8  
9  
10  
11  
12  
13  
14  
15  
16  
17  
18  
19  
20  
21  
22  
23  
24  
25  
26  
27  
28  
29  
30  
31  
32  
33  
34  
35  
36  
37  
38  
39  
40  
41  
42  
43  
44  
45  
46  
47  
48  
49  
50  
51  
52  
53  
54  
55  
56  
57  
58  
59  
60

|           |                                                                                                                                    |
|-----------|------------------------------------------------------------------------------------------------------------------------------------|
| Keywords: | Depression & mood disorders < PSYCHIATRY, PRIMARY CARE, alcohol use disorder, clinical detection, low- and middle-income countries |
|           |                                                                                                                                    |

SCHOLARONE™  
Manuscripts

For peer review only

1  
2  
3 Detection and treatment initiation for depression and alcohol use disorders: facility-based  
4 cross-sectional studies in five low- and middle-income country districts  
5  
6  
7  
8

9 Sujit D Rathod\*, Tessa Roberts, Girmay Medhin, Vaibhav Murhar, Sandesh Samudre,  
10 Nagendra P. Luitel, One Selohilwe, Joshua Ssebunnya, Mark Jordans, Arvin Bhana, Inge  
11 Petersen, Fred Kigozi, Juliet Nakku, Crick Lund, Abebaw Fekadu\*\*, Rahul Shidhaye\*\*  
12  
13

14  
15  
16 Sujit D Rathod, Department of Population Health, London School of Hygiene & Tropical  
17 Medicine, United Kingdom  
18

19 Tessa Roberts, Centre for Global Mental Health, Department of Population Health, London  
20 School of Hygiene & Tropical Medicine, United Kingdom, and Department of Health  
21 Services and Population Research, Institute of Psychiatry, Psychology & Neuroscience,  
22 King's College London, United Kingdom. [tessa.roberts@lshtm.ac.uk](mailto:tessa.roberts@lshtm.ac.uk)  
23

24 Girmay Medhin, Aklilu Lemma Institute of Pathobiology, Addis Ababa University, Ethiopia.  
25 [gtmedhin@yahoo.com](mailto:gtmedhin@yahoo.com)  
26  
27

28 Vaibhav Murhar, Sangath, Bhopal, India. [vaibhav.murhar@sangath.in](mailto:vaibhav.murhar@sangath.in)  
29

30 Sandesh Samudre, Institute of Psychiatry, Psychology and Neuroscience, Health Services and  
31 Population Research Department, King's College London, UK and Centre for Chronic  
32 Conditions and Injuries, Public Health Foundation of India, New Delhi, India.  
33 [sandesh.samudre@kcl.ac.uk](mailto:sandesh.samudre@kcl.ac.uk)  
34

35 Nagendra P. Luitel, Transcultural Psychosocial Organization (TPO) Nepal Kathmandu,  
36 Kathmandu Nepal, [luitelnp@gmail.com](mailto:luitelnp@gmail.com)  
37  
38

39 One Selohilwe, Centre for Rural Health, School of Nursing and Public Health, University of  
40 KwaZulu-Natal, Durban, South Africa. [selohilwe@ukzn.ac.za](mailto:selohilwe@ukzn.ac.za)  
41

42 Joshua Ssebunnya, Makerere University/Butabika National Referral and Teaching Mental  
43 Hospital, Kampala – Uganda. [joy95h@yahoo.co.uk](mailto:joy95h@yahoo.co.uk)  
44

45 Mark Jordans, Centre for Global Mental Health, Institute of Psychiatry, Psychology and  
46 Neurosciences, King's College London, United Kingdom. [mark.jordans@kcl.ac.uk](mailto:mark.jordans@kcl.ac.uk)  
47  
48

49 Arvin Bhana, Health Systems Research Unit, South African Medical Research Council,  
50 Honorary Associate Professor, Centre for Rural Health, School of Nursing and Public Health,  
51 College of Health Sciences, University of KwaZulu-Natal. [arvin.bhana@gmail.com](mailto:arvin.bhana@gmail.com)  
52

53 Inge Petersen, Centre for Rural Health, School of Nursing and Public Health, University of  
54 KwaZulu-Natal, Durban, South Africa. [peterseni@ukzn.ac.za](mailto:peterseni@ukzn.ac.za)  
55  
56  
57  
58  
59

1  
2  
3 Fred Kigozi, Makerere University/ Butabika National Referral and Teaching Mental Hospital,  
4 Kampala – Uganda, [fredkigozi@yahoo.com](mailto:fredkigozi@yahoo.com)  
5

6 Juliet Nakku, Makerere University/ Butabika National Referral and Teaching Mental  
7 Hospital, Kampala – Uganda, [jnakku@yahoo.com](mailto:jnakku@yahoo.com)  
8

9 Crick Lund, Alan J Flisher Centre for Public Mental Health, Department of Psychiatry and  
10 Mental Health, University of Cape Town, South Africa; and Centre for Global Mental Health,  
11 Institute of Psychiatry, Psychology and Neurosciences, King's College London, United  
12 Kingdom. [crick.lund@uct.ac.za](mailto:crick.lund@uct.ac.za)  
13  
14

15 Abebaw Fekadu, Professor, Centre for Innovative Drug Development and Therapeutic Trials  
16 for Africa (CDT-Africa), College of Health Sciences, Addis Ababa University, Addis Ababa,  
17 Ethiopia; Global Health & Infection Department, Brighton and Sussex Medical School,  
18 Brighton, United Kingdom, [a.fekadu@bsms.ac.uk](mailto:a.fekadu@bsms.ac.uk)  
19  
20

21 Rahul Shidhaye, Public Health Foundation of India, New Delhi, India and CAPHRI (Care  
22 and Public Health Research Institute) and Maastricht University, Netherlands.  
23 [rahul.shidhaye@phfi.org](mailto:rahul.shidhaye@phfi.org)  
24

25 Word count: 3509  
26

27 \*Corresponding author: Department of Population Health, London School of Hygiene &  
28 Tropical Medicine, Keppel Street, United Kingdom WC1E7HT. [sujit.rathod@lshtm.ac.uk](mailto:sujit.rathod@lshtm.ac.uk) Ph:  
29 +44 0207 299 4683  
30  
31

32  
33 \*\* Contributed equally  
34  
35  
36  
37  
38  
39  
40  
41  
42  
43  
44  
45  
46  
47  
48  
49  
50  
51  
52  
53  
54  
55  
56  
57  
58  
59  
60

## Abstract

**Objectives:** To estimate the proportion of adult primary care outpatients who are clinically detected and initiate treatment for depression and alcohol use disorder (AUD) in low- and middle-income country (LMIC) settings.

**Design:** Five cross-sectional studies

**Setting:** Adult outpatient services in 36 primary health care facilities in Sodo District, Ethiopia (9 facilities); Sehore District, India (3); Chitwan District, Nepal (8); Dr Kenneth Kaunda District, South Africa (3); and Kamuli District, Uganda (13).

**Participants:** Between 760 and 1893 adults were screened in each district. Across 5 districts, between 4.2 and 20.1% screened positive for depression and between 1.2 and 16.4% screened positive for AUD. 96% of screen-positive participants provided details about their clinical consultations that day.

**Primary outcomes:** Detection of depression, treatment initiation for depression, detection of AUD, treatment initiation for AUD

**Results:** Among depression screen-positive participants, clinical detection of depression ranged from 0% in India to 11.7% in Nepal. Small proportions of screen-positive participants received treatment (0% in Ethiopia, India and South Africa to 4.2% in Uganda). Among AUD screen-positive participants, clinical detection of AUD ranged from 0% in Ethiopia and India to 7.8% in Nepal. Treatment was 0% in all countries aside Nepal, where it was 2.2%.

**Conclusions:** The findings of this study suggest large detection and treatment gaps for adult primary care patients, which are likely contributors to the population-level mental health treatment gap in LMIC. Primary care facilities remain unfulfilled intervention points for reducing the population-level burden of disease in LMIC.

### Strengths and limitations of the study

- This was a multi-country survey of diverse clinical settings, with large sample sizes, structured interviews, and used of validated screening tools to identify cases.
- The methods used here are demonstrably flexible and are replicable in other low-income settings, particularly for monitoring and evaluation purposes.

- We used highly sensitive and non-specific coding criteria for our primary outcomes (i.e. detection and treatment initiation), and so outcome misclassification is possible.

**Keywords:** depression, alcohol use disorder, primary care, detection, treatment, low- and middle-income countries

For peer review only

## BACKGROUND

Mental, Neurological and Substance use disorders (MNS) contribute significantly to the Global Burden of Disease (GBD) and account for one in every 10 lost years of health globally.[1] In 2010, the absolute Disability-Adjusted Life-Years (DALYs) due to MNS disorders was 258 million DALYs which is 10.4% of the total disease burden. MNS disorders were also the leading cause of years lived with disability globally.[1] In addition to this, MNS disorders act as a significant risk factor for premature death [2] and also accounts for substantial adverse social and economic consequences.[1,3] Depression accounts for 40.5% of DALYs caused by mental and substance use disorders while Alcohol Use Disorders (AUD) account for 9.6%.[4]

In low- and middle-income countries (LMICs) the population-level treatment gap is estimated to be between 76.3% and 91.9% for depression and between 94.9% and 97.2% for AUD.[5] There is an emerging evidence base demonstrating that depression and AUD can be treated by primary care providers in LMIC [6]; the World Health Organization's mhGAP guidelines support integration of mental health services into primary care as a means of narrowing the treatment gap.[7] People affected by depression and AUD often present in primary health care facilities [8,9] though not specifically for these disorders. These disorders co-occur with both acute and chronic medical problems; an untreated mental health disorder worsens the prognosis for the co-morbid condition.[10,11] The population-level treatment gap can be reduced by enhancing the capacity of primary care staff to detect, diagnose and treat these disorders.[12] Clinical detection of depression is estimated to be 47% from a meta-analysis of 41 studies conducted in primary care settings [13] and 42% for AUD from a meta-analysis of 12 studies. [14] However, these meta-analyses were not able to identify studies conducted in LMIC settings, where the majority of people with depression and AUD in the world live, and where a paucity of mental health in the pre-service training of general health care providers as well as competing demands in under-resourced healthcare systems likely compromise the ability of clinicians to detect mental disorders. Little is therefore known regarding the detection levels of depression and AUD in primary care settings in LMICs.

The aims of this report were to estimate the proportion of adult primary care outpatients who are clinically detected and initiate treatment for depression and alcohol use disorder (AUD) in low- and middle-income country (LMIC) settings.

## METHODS

### Context, setting and participants

PRIME is a six-year multi-country research program consortium which, in collaboration with national and district Ministries of Health, has developed Mental Health Care Plans to support delivery of services for mental disorders in the public sector in Ethiopia (Sodo District), India (Sehore District, Madhya Pradesh State), Nepal (Chitwan District), South Africa (Dr Kenneth Kaunda District, North West Province), and Uganda (Kamuli District).[15,16] Two key research questions of the PRIME evaluation – detailed in a separate report [17] - were to assess the change in detection and change in initiation of treatment among adults presenting in primary health facilities, as a consequence of implementing the district mental healthcare plans. These questions were investigated by conducting cross-sectional facility-based patient surveys before and after the mental healthcare plan implementation. The two populations of interest for the study were the adult patients who screened positive 1) for depression and 2) for AUD.

Details about the study settings and clinics are in Table 1.

Table 1. Geographic and health facility characteristics of PRIME implementation areas, 2013-2014.

| Country                                                 | Ethiopia                                                                                       | India                                                                | Nepal                                                                                                                        | South Africa                                                                                      | Uganda                                                                                                                                                |
|---------------------------------------------------------|------------------------------------------------------------------------------------------------|----------------------------------------------------------------------|------------------------------------------------------------------------------------------------------------------------------|---------------------------------------------------------------------------------------------------|-------------------------------------------------------------------------------------------------------------------------------------------------------|
| <b>Implementation area</b>                              | Sodo District                                                                                  | Sehore and Shyampur sub-districts of Sehore District, Madhya Pradesh | Chitwan District*                                                                                                            | Orkney catchment area of Matlosana sub-district of Dr Kenneth Kaunda District, Northwest Province | Kamuli District                                                                                                                                       |
| <b>Population</b>                                       | 161,952                                                                                        | 212,192                                                              | 108,368                                                                                                                      | 90,000                                                                                            | 518,200                                                                                                                                               |
| <b>Area, km<sup>2</sup></b>                             | 867                                                                                            | 1,039                                                                | 342                                                                                                                          | 31                                                                                                | 4,278                                                                                                                                                 |
| <b># and type of health facility</b>                    | 8 public and 1 private health clinics                                                          | 3 Community Health Centres                                           | 9 Health Posts and 1 Primary Health Care Centre**                                                                            | 1 Community Health Centre (CHC) and 3 Primary Health Care (PHC) clinics***                        | 12 Health Centres (Level III and IV) 1 primary care department in the district hospital                                                               |
| <b>Primary provider types</b>                           | Health Officer                                                                                 | Medical Officer                                                      | Medical officers, Health Assistants, Auxiliary Health Workers                                                                | Nurse, PHC doctor                                                                                 | Medical Officer                                                                                                                                       |
| <b>Primary care services provided in the facilities</b> | Primary care, Emergency; delivery care, mother and baby care, family planning and immunization | Primary, acute, Reproductive and child health                        | Outpatient; immunization; family planning; safe motherhood and new born care; anti- and post-natal care; delivery of babies. | Chronic care                                                                                      | Outpatient; emergency; immunization; maternal and child health; family planning, health education and Primary care in general including mental health |

\* Implementation area consists of 10 of the 38 Village Development Committees/Municipalities of Chitwan District

\*\* 222 study participants from 2 of the 10 health facilities are excluded from analysis

\*\*\* 1 of the 3 PHC clinics was an implementation pilot site and was excluded from study data collection.



1  
2  
3 The choice of included clinics was determined by the availability of staff who were planned  
4 to have authority to detect/ diagnose, prescribe and/or refer for depression and AUD, which,  
5 per the respective country's mental healthcare plan included clinics with health officers,  
6 medical officers, health assistants and auxiliary health workers, nurses and doctors. In South  
7 Africa, one of the PHC clinics was excluded from the study due to mental health care plan  
8 training prior to the baselines survey round. In South Africa, nurses in the primary care  
9 clinics could refer suspected cases to a physician (for both disorders) and provide brief  
10 counselling (for non-dependent alcohol use disorder) and so these clinics were included. Only  
11 patients attending for chronic care services (e.g. HIV, tuberculosis, diabetes, hypertension,  
12 etc) were eligible for this study, reflecting eligibility for treatment in accordance with the  
13 South African mental health care plan. In Nepal, clinicians working in two clinics received  
14 mental health training prior to the baseline survey round; these clinics are included for  
15 clinical-level descriptive reporting but participants from these clinics are excluded for  
16 analysis here. All clinics were government run, aside one in Ethiopia.

### 26 **Sample size**

27  
28 For each country and disorder the sample size was set to have 80% power and a two-sided  
29 alpha of 0.05 for the two primary aims: 1) to detect a change in detection and 2) to detect a  
30 change in initiation of evidence-based treatment for depression and for AUD between the  
31 baseline and follow-up round. The baseline round was set prior to implementation of the  
32 mental health care plan and follow-up round was scheduled to start at least 18 months later,  
33 which assumed the plan had been fully embedded for several months. Country teams in  
34 Nepal and Uganda planned to conduct an interim survey round immediately after embedding,  
35 to assess the short-term effect of implementation on detection and treatment. Findings from  
36 interim and follow-up surveys will be detailed in future reports. Depending on country, the  
37 baseline level of detection was assumed to be 0-5%, and at follow-up targeted to reach 20-  
38 30%. The required sample size was adjusted to account for the possibility of false positives  
39 generated by screening tools, using site-specific figures for the positive predictive value.  
40 Within each country, whichever disorder required the higher sample size dictated the sample  
41 size. This sample size was increased by a factor of 2-3x to facilitate equity analyses, e.g.  
42 comparisons of outcomes by sex or by socioeconomic status. The target sample sizes for each  
43 country in each study round were 1000 in Ethiopia, 760 in India, 1400 in Nepal, 1200 in  
44 South Africa and 1800 in Uganda. Within each country the total target sample size was then  
45  
46  
47  
48  
49  
50  
51  
52  
53  
54  
55  
56  
57  
58  
59  
60

1  
2  
3 allocated by clinic in proportion to measures of clinic outpatient volume, such that busier  
4 clinics were allocated a larger recruitment target than less busy clinics.  
5

6  
7 Details of the sampling and data collection procedures in Table 2.  
8  
9  
10  
11  
12  
13  
14  
15  
16  
17  
18  
19  
20  
21  
22  
23  
24  
25  
26  
27  
28  
29  
30  
31  
32  
33  
34  
35  
36  
37  
38  
39  
40  
41  
42  
43  
44  
45  
46  
47  
48  
49  
50  
51  
52  
53  
54  
55  
56  
57  
58  
59  
60

Table 2. Sample selection and data collection procedures for facility surveys, 2013-2014.

| <b>Country site</b>                              | <b>Ethiopia</b>                                    | <b>India</b>                                                       | <b>Nepal</b>                                                                    | <b>South Africa</b>                                                            | <b>Uganda</b>                                                                          |
|--------------------------------------------------|----------------------------------------------------|--------------------------------------------------------------------|---------------------------------------------------------------------------------|--------------------------------------------------------------------------------|----------------------------------------------------------------------------------------|
| <b>Survey dates</b>                              | June-July 2013                                     | Aug-Oct 2013                                                       | Sept 2013-Feb 2014                                                              | Feb-April 2014                                                                 | July-Nov 2013                                                                          |
| <b>Study language</b>                            | Amharic                                            | Hindi                                                              | Nepali                                                                          | English, seTswana                                                              | English, Luganda                                                                       |
| <b>Recruitment / sampling method</b>             | Consecutive sampling of adults at registration     | Systematic sampling of every 5 <sup>th</sup> adult at registration | Random selection of 1 adult from those who arrived since last interview started | Opportunistic sampling of adult volunteers in chronic care clinic waiting area | Consecutive sampling of adults at registration                                         |
| <b>Consent documented with</b>                   | Signature or thumbprint                            | Signature or thumbprint                                            | Signature or verbal affirmation                                                 | Signature or signed 'X' with independent witness signature                     | Signature or verbal affirmation.                                                       |
| <b># approached</b>                              | 1014                                               | 760                                                                | 1553                                                                            | 9780                                                                           | 1922                                                                                   |
| <b># eligible</b>                                | 1014                                               | 760                                                                | 1553                                                                            | 1322                                                                           | 1922                                                                                   |
| <b># consented (% consent rate)</b>              | 1014 (100)                                         | 760 (100)                                                          | 1474 (94.9)                                                                     | 1322 (100)                                                                     | 1893 (98.5)                                                                            |
| <b>Questionnaire data collection mode</b>        | Paper-and-pencil, double data entry with EpiData 3 | Android mobile device                                              | Android mobile device                                                           | Android mobile device                                                          | Android mobile device                                                                  |
| <b>Depression screen positive is PHQ-9 &gt;=</b> | 10                                                 | 10                                                                 | 10                                                                              | 10                                                                             | 10                                                                                     |
| <b>AUD screen positive is AUDIT &gt;=</b>        | 8                                                  | 8                                                                  | 9                                                                               | 16                                                                             | 8                                                                                      |
| <b>Clinical consultation form</b>                | Purpose-built form                                 | Extracted from clinical records maintained at the facility         | Purpose-built form                                                              | Extracted from clinic records                                                  | Consultation notes extracted from patient's notebook as part of the exit questionnaire |

## Sampling and recruitment

Inclusion criteria for participation were as follows: above age of majority in the country (i.e. 16 years or 18 years); fluency in a local study language; time and ability to complete the full interview; and willingness to provide informed consent. Exclusion criteria were as follows: incapacity to provide informed consent (e.g. presence of severe intellectual disability, currently experiencing an acute medical issue). The research team for each country trained its interviewers to assess eligibility.

Logistic and cultural constraints dictated the sampling procedure within each country, meaning that random selection for a representative sample was not always possible. In Ethiopia and Uganda, to minimize disruption, consecutive sampling of all eligible patients upon registration minimized the amount of time research staff spent in the clinics. In South Africa, research staff provided a group orientation to the study to all patients in the waiting room, and then asked interested patients to self-nominate for recruitment. In India, research assistants approached every fifth patient registering at reception and assessed them for eligibility. Among eligible patients approached, over 94% consented to participate in all countries.

## Data collection procedures

The facility interview was comprised of a screening questionnaire, an exit questionnaire and/or a clinical consultation form. Interviewers administered the two-part screening questionnaire, with part 1 used to identify probable cases. For probable cases and optionally for probable non-cases, interviewers completed part 2 of the screening questionnaire. For these same participants, the interviewer completed the exit questionnaire with the participant and/or requested a consultation form from that participant's clinician. In Uganda patients maintained their own medical files in a notebook which is handed over to clinicians during consultations, and so the clinical consultation form data were synonymous with exit questionnaire data. The data collection flow chart for each country is shown as Supplemental Figures 1a-1e.

The sections within the screening interview questionnaire are described in Table 3.

Table 3. Screening interview sections for PRIME facility detection study, 2013-2014.

| <b>Section</b>                                      | <b># items</b> | <b>Source</b>                                                                                                                               |
|-----------------------------------------------------|----------------|---------------------------------------------------------------------------------------------------------------------------------------------|
| Part 1                                              |                |                                                                                                                                             |
| Basic demographic characteristics                   | 5              | Purpose-built for PRIME                                                                                                                     |
| Alcohol use disorder screening                      | 10             | Alcohol Use Disorder Identification Test (AUDIT) [18]                                                                                       |
| Alcohol: recent treatment history and intentions    | 23             | Purpose-built for PRIME                                                                                                                     |
| Alcohol: internalized stigma                        | 20             | Adapted from the Composite International Diagnostic Interview Services module [19] and the Barriers to Access to Care Evaluation Scale [20] |
| Depression screening                                | 9              | Patient's Health Questionnaire (PHQ-9) [21]                                                                                                 |
| Depression symptoms in the past 12 months           | 1              | Purpose-built for PRIME                                                                                                                     |
| Depression: recent treatment history and intentions | 23             | Purpose-built for PRIME                                                                                                                     |
| Depression: internalized stigma                     | 20             | Adapted from the Composite International Diagnostic Interview Services module [19] and the Barriers to Access to Care Evaluation Scale [20] |
| Suicidality                                         | 7              | Adapted from the Composite International Diagnostic Interview (CIDI) suicidality module [19].                                               |
| Part 2                                              |                |                                                                                                                                             |
| Disability                                          | 12             | World Health Organization Disability Assessment Schedule (WHODAS) 2.0 [22]                                                                  |
| Detailed sociodemographic characteristics           | 18             | Purpose-built for PRIME                                                                                                                     |

### **Data collection measures**

Part 1 of the screening questionnaire consisted of sections on sociodemographic characteristics, screening for depression, depression symptoms in the past 12 months (aside in Ethiopia), and screening for AUD. A probable case of depression was a participant who was PHQ-9 positive or had recent depression symptoms, and a probable case of AUD was a participant who was AUDIT positive. Probable cases completed disorder-specific sections about recent (12 month) history of treatment seeking for their most recent episode of symptoms, and about internalized stigma. Part 2 consisted sections about sociodemographic characteristics and disability status. The exit questionnaire and clinical consultation form were thematically similar, and consisted of a mix of open- and closed-ended questions about that day's clinical consultation, and specifically about diagnoses, advice, referrals and prescriptions. Each country developed their own exit questionnaire and clinical consultation form to enable data collection by interviewers with the participant and by the clinician directly, respectively, in recognition of the context specific nature of patient-clinician interactions and the local idioms of distress. In addition to the questionnaire items described here, which were largely consistent across PRIME country sites, research teams included country-specific questions and sections, which will be described in future reports. See PRIME website ([www.prime.uct.ac.za](http://www.prime.uct.ac.za)) for the purpose-built sections of the PRIME questionnaires.

### **Mental health measures**

The denominators for the primary outcome measures consist of those participants who screen positive for depression or for AUD, using the PHQ-9 and AUDIT, respectively. The PHQ-9 is a widely used screening tool that has been validated for use in all five countries.[23–27]. In this study, Cronbach's alpha for the PHQ-9 ranged between 0.74 in India and 0.80 in Nepal. A score of 10 or more on the PHQ-9 screen was considered a positive screen. The AUDIT tool has been validated in India, Nepal and South Africa [28–30] and in countries neighbouring Uganda.[31,32] In this study, Cronbach's alpha for AUDIT ranged from 0.66 in Uganda to 0.88 in Nepal. An AUDIT score of  $\geq 20$  was considered to indicate alcohol dependence, while scores of 16-19 and 8-15 were classified as harmful and hazardous drinking, respectively. A score of 8 or more in Ethiopia, India and Uganda, 9 or more in Nepal and 16 or more in South Africa, was considered a positive screen. The higher cut off

1  
2  
3 score in South Africa was set to account for services being targeted to those with harmful and  
4 dependent alcohol use.  
5

### 6 7 **Outcome assessment**

8  
9 The numerators for the primary outcome measures were derived from participant exit  
10 questionnaire data when available (India, Nepal, South Africa, Uganda), and alternatively  
11 from the clinician consultation form data (Ethiopia). Given the sparse level of detail patients  
12 were expected to recall and/or clinicians were expected to record, cross-country variation in  
13 the terminology around detection and treatment, as well as expected low levels of detection  
14 and treatment at baseline, highly sensitive and non-specific coding criteria – detailed in Table  
15 4 - were adopted and used for the outcomes' numerators. These criteria were informed by  
16 WHO's mhGAP guidelines.[7]  
17  
18  
19  
20  
21  
22  
23  
24  
25  
26  
27  
28  
29  
30  
31  
32  
33  
34  
35  
36  
37  
38  
39  
40  
41  
42  
43  
44  
45  
46  
47  
48  
49  
50  
51  
52  
53  
54  
55  
56  
57  
58  
59  
60

Table 4: Criteria used to assess detection and treatment of depression and alcohol use disorders in the PRIME facility detection study, 2013-2014.

| <b>Detection of depression</b>                                                                                                                                                                                                                                                                                                                                                                                                                                                                                                | <b>Treatment of depression</b>                                                                                                                                                                                                                                                                                                                                                                                                                                                                                                                                                                                   |
|-------------------------------------------------------------------------------------------------------------------------------------------------------------------------------------------------------------------------------------------------------------------------------------------------------------------------------------------------------------------------------------------------------------------------------------------------------------------------------------------------------------------------------|------------------------------------------------------------------------------------------------------------------------------------------------------------------------------------------------------------------------------------------------------------------------------------------------------------------------------------------------------------------------------------------------------------------------------------------------------------------------------------------------------------------------------------------------------------------------------------------------------------------|
| <p><i>Included:</i></p> <ul style="list-style-type: none"> <li>• Diagnosis of “depression”</li> <li>• Diagnosis of “stress”, “distress”, “behavioural problem”, “mental disorder”, or “psychiatric problem”</li> <li>• Diagnosis assumed if unambiguous depression treatment given</li> </ul> <p><i>Excluded:</i></p> <ul style="list-style-type: none"> <li>• Diagnosis of “anxiety”, “insomnia”, “tension headache”, “stress headache”, “schizophrenia”, “epilepsy”, “bipolar”, “central nervous system problem”</li> </ul> | <p><i>Included:</i></p> <ul style="list-style-type: none"> <li>• Prescription of SSRI (e.g. fluoxetine)</li> <li>• Referral to a mental health specialist</li> <li>• Advice on stress reduction or management - only with depression diagnosis</li> <li>• Prescription of tricyclic antidepressant (e.g. amitriptyline) only with depression diagnosis</li> <li>• Referral to counselling or talking treatment – only with depression diagnosis</li> </ul> <p><i>Excluded:</i></p> <ul style="list-style-type: none"> <li>• Diazepam prescription</li> <li>• Non-specific referrals (e.g. "hospital")</li> </ul> |
| <b>Detection of alcohol use disorder</b>                                                                                                                                                                                                                                                                                                                                                                                                                                                                                      | <b>Treatment of alcohol use disorder</b>                                                                                                                                                                                                                                                                                                                                                                                                                                                                                                                                                                         |
| <p><i>Included:</i></p> <ul style="list-style-type: none"> <li>• Diagnosis of “AUD”, “alcohol problem” or “drinking problem”</li> <li>• Diagnosis assumed if unambiguous AUD treatment given</li> </ul> <p><i>Excluded:</i></p> <ul style="list-style-type: none"> <li>• Drug abuse or other substance use problems</li> </ul>                                                                                                                                                                                                | <p><i>Included:</i></p> <ul style="list-style-type: none"> <li>• Referral to a mental health or addictions specialist</li> <li>• Prescription of diazepam or Vitamin B – only with AUD diagnosis</li> <li>• Counselling or talking treatment – only with AUD diagnosis</li> </ul> <p><i>Excluded:</i></p> <ul style="list-style-type: none"> <li>• Non-specific referrals (e.g. "hospital")</li> </ul>                                                                                                                                                                                                           |

Abbreviations: AUD, alcohol use disorder; SSRI, selective serotonin reuptake inhibitor



1  
2  
3 Outcome assessors (TR, SS and SDR) independently double-coded the outcomes for  
4 detection (Yes/No) and treatment (Yes/No) with 99% initial scoring agreement.  
5  
6 Disagreements were resolved through further discussion.  
7

## 8 **Analysis**

9  
10 First, the sociodemographic characteristics and mental health screening scores of participants  
11 were summarised by presenting the median and interquartile range for continuous measures  
12 and counts and percentages for categorical measures. Second, for depression screen-positive  
13 participants, the numbers and proportions who had outcome data, were detected for  
14 depression, and who had initiation of minimally adequate evidence-based treatment were  
15 reported. The same figures were reported for AUD screen-positive participants and AUD.  
16 Finally, depression and AUD detection figures are reported for participants who were  
17 depression and AUD screen-negative and who did not have depression symptoms over the  
18 past 12 months. These latter figures are indicators – though not definitive evidence - for  
19 either mis- or over-diagnosis. All analyses were conducted in Stata 14.1 (StataCorp, College  
20 Station, TX, USA), and stratified by country. (See supplemental file ‘stata do file code.docx’)  
21  
22  
23  
24  
25  
26  
27  
28

## 29 **Ethics**

30  
31 All participants gave written or verbal informed consent prior to being interviewed (Table 2).  
32 The informed consent form made clear there would be no negative effects for non-  
33 participation. In South Africa, participants were provided a 30 Rand (~2.80 USD)  
34 supermarket voucher as a token of appreciation. In all countries, participants who endorsed  
35 questionnaire items about suicidality were referred to a provider in the clinic.  
36  
37  
38  
39

40 The institutional review boards of the World Health Organization (Geneva, Switzerland),  
41 University of Cape Town (South Africa), College of Health Sciences of Addis Ababa  
42 University (Ethiopia), Indian Council of Medical Research (New Delhi, India), Sangath (Goa,  
43 India), Nepal Health Research Council (Kathmandu, Nepal), Makerere University (Kampala,  
44 Uganda), and the National Council of Science and Technology (Kampala, Uganda) reviewed  
45 and approved the protocols and informed consent procedures for this study.  
46  
47  
48  
49  
50

## 51 **Patient involvement**

The PRIME interventions and evaluations were informed through Theory of Change workshops held in each country [33]. These workshops included national- and district-level representatives, health service providers, and, in some countries, mental health service users.

## RESULTS

The demographic and mental health screening characteristics of participants are detailed in Table 5.

Table 5: Demographic and mental health characteristics for facility detection survey participants, 2013-14

| <b>Country site</b><br>[sample size]     | <b>Ethiopia</b><br>[n=1014] | <b>India</b><br>[n=760]     | <b>Nepal*</b><br>[n=1252]   | <b>South Africa</b><br>[n=1322] | <b>Uganda</b><br>[n=1893]   |
|------------------------------------------|-----------------------------|-----------------------------|-----------------------------|---------------------------------|-----------------------------|
|                                          | Median<br>(IQR) or n<br>(%) | Median<br>(IQR) or n<br>(%) | Median<br>(IQR) or n<br>(%) | Median<br>(IQR) or n<br>(%)     | Median<br>(IQR) or n<br>(%) |
| Age, years                               | 30 (23-45)                  | 37 (27-51)                  | 36 (27-50)                  | 46 (37-56)                      | 28 (22-37)                  |
| Female                                   | 551 (54.3)                  | 386 (50.8)                  | 813 (64.9)                  | 992 (75.0)                      | 1500 (79.2)                 |
| Education                                |                             |                             |                             |                                 |                             |
| Less than primary                        | 692 (68.3)                  | 381 (50.1)                  | 444 (35.5)                  | 308 (23.3)                      | 174 (9.2)                   |
| Primary                                  | 230 (22.7)                  | 186 (24.5)                  | 253 (20.2)                  | 829 (62.7)                      | 1113 (58.8)                 |
| Secondary or more                        | 91 (9.0)                    | 193 (25.4)                  | 555 (44.3)                  | 185 (14.0)                      | 606 (32.0)                  |
| PHQ-9 score                              | 4 (1-7)                     | 6 (4-9)                     | 4 (2-7)                     | 3 (1-6)                         | 2 (1-4)                     |
| PHQ-9 positive**                         | 117 (11.5)                  | 153 (20.1)                  | 186 (14.9)                  | 107 (8.1)                       | 80 (4.2)                    |
| Depression symptoms<br>in past 12 months |                             | 110 (14.5)                  | 174 (13.9)                  | 157 (11.9)                      | 159 (8.4)                   |
| AUDIT score                              | 2 (0-5)                     | 0 (0-0)                     | 0 (0-1)                     | 0 (0-4)                         | 0 (0-0)                     |
| Alcohol abstinent                        | 275 (27.1)                  | 659 (86.7)                  | 849 (67.8)                  | 724 (54.8)                      | 1475 (77.9)                 |
| AUDIT positive**                         | 166 (16.4)                  | 35 (4.6)                    | 92 (7.3)                    | 43 (3.2)                        | 23 (1.2)                    |
| Dependent alcohol<br>use                 | 37 (3.6)                    | 3 (0.4)                     | 32 (2.6)                    | 21 (1.6)                        | 2 (0.1)                     |

\* Excluding 222 patients from 2 clinics

1  
2  
3 Ages ranged from a median of 28 years in Uganda to 46 years in South Africa. The majority  
4 of participants in all countries were female, from 51% in India to 79% in Uganda. The  
5 proportion of participants who screened positive for depression ranged between 20% in India  
6 to 4.2% in Uganda, for depression symptoms in the past 12 months ranged between 8% in  
7 Uganda to 14% in India, and for AUDIT between 1% in Uganda and 16% in Ethiopia. These  
8 probable cases were asked to complete the Exit interview and/or their clinicians asked to  
9 complete a consultation form. Outcome data were available for 96% of these participants  
10 (from clinical consultation forms or exit questionnaires), though exit questionnaire  
11 completion was lower for depression screen-positive participants in Uganda (48/80, 60%),  
12 and AUD screen-positive participants in South Africa (38/43, 90%) and Uganda (18/23,  
13 78%), respectively. Non-completion was primarily due to participants having to leave the  
14 clinic immediately or the interviewer being unable to locate the participant after their  
15 consultation.  
16  
17  
18  
19  
20  
21  
22  
23

24 The proportions of screen-positive participants who were detected and who started treatment  
25 are presented in Table 6.  
26  
27  
28  
29  
30  
31  
32  
33  
34  
35  
36  
37  
38  
39  
40  
41  
42  
43  
44  
45  
46  
47  
48  
49  
50  
51  
52  
53  
54  
55  
56  
57  
58  
59  
60

Table 6. Detection and treatment among screen-positive adults in PRIME implementation clinics, 2013-2014.

| Country site                             | Ethiopia                | India       | Nepal                   | South Africa          | Uganda               |
|------------------------------------------|-------------------------|-------------|-------------------------|-----------------------|----------------------|
| <b>Depression</b>                        |                         |             |                         |                       |                      |
| Outcome data collected / screen positive | 117/117                 | 153/153     | 179/186                 | 103/107               | 48/80                |
| Detected, n (%; 95% CI)                  | 12/117 (10.3, 5.9-17.2) | 0/153 (0.0) | 21/179 (11.7, 7.8-17.3) | 6/103 (5.8, 2.6-12.4) | 2/48 (4.2, 1.0-15.4) |
| Treatment initiated, n (%; 95% CI)       | 0/117 (0.0)             | 0/153 (0.0) | 1/179 (0.5, 0.0-3.9)    | 0/103 (0.0)           | 2/48 (4.2, 1.0-15.4) |
| <b>Alcohol Use Disorder</b>              |                         |             |                         |                       |                      |
| Outcome data collected / screen positive | 166/166                 | 35/35       | 90/92                   | 38/43                 | 18/23                |
| Detected, n (%; 95% CI)                  | 0/166 (0.0)             | 0/35 (0.0)  | 7/90 (7.8, 3.7-15.6)    | 0/38 (0.0)            | 1/18 (5.6, 0.7-32.2) |
| Treatment initiated, n (%; 95% CI)       | 0/116 (0.0)             | 0/35 (0.0)  | 2/90 (2.2, 0.5-8.6)     | 0/38 (0.0)            | 0/18 (0.0)           |

1  
2  
3 Among depression screen-positive participants, detection of depression ranged from 0% in  
4 India to 11.7% in Nepal. Small proportions of screen-positive participants received treatment  
5 (0% in Ethiopia, India and South Africa to 4.2% in Uganda). Among AUD screen-positive  
6 participants, detection of AUD ranged from 0% in Ethiopia and India to 7.8% in Nepal.  
7  
8 Treatment was 0% in all countries aside Nepal, where it was 2.2%.  
9  
10

11 For probable non-cases, detection of depression ranged from 0/557 (0.0%) in India to 3/74  
12 (4.0%) in Nepal, and detection of AUD ranged from 0/557 (0.0%) in India to 2/74 (2.7%) in  
13 Nepal. Treatment was almost entirely absent. (See Table 7)  
14  
15  
16  
17  
18  
19  
20  
21  
22  
23  
24  
25  
26  
27  
28  
29  
30  
31  
32  
33  
34  
35  
36  
37  
38  
39  
40  
41  
42  
43  
44  
45  
46  
47  
48  
49  
50  
51  
52  
53  
54  
55  
56  
57  
58  
59  
60

Table 7. Detection and treatment among probable non-cases in PRIME implementation clinics, 2013-2014.

| <b>Country site (# depression and AUD screen-negative and no depression symptoms in 12 months)</b> | <b>Ethiopia (n=752)</b> | <b>India (n=557)</b> | <b>Nepal (n=74)</b> | <b>South Africa (n=113)</b> | <b>Uganda (n=332)</b> |
|----------------------------------------------------------------------------------------------------|-------------------------|----------------------|---------------------|-----------------------------|-----------------------|
| <b>Depression</b>                                                                                  |                         |                      |                     |                             |                       |
| Detected, n (%)                                                                                    | 16/752 (2.1)            | 0/557 (0.0)          | 3/74 (4.1)          | 4/113 (3.5)                 | 2/332 (0.6)           |
| Treatment initiated, n (%)                                                                         | 0/752 (0.0)             | 0/557 (0.0)          | 0/74 (0.0)          | 3/113 (2.6)                 | 1/332 (0.3)           |
| <b>Alcohol use disorder</b>                                                                        |                         |                      |                     |                             |                       |
| Detected, n (%)                                                                                    | 0/752 (0.0)             | 0/557 (0.0)          | 2/74 (2.7)          | 2/113 (1.8)                 | 1/332 (0.3)           |
| Treatment initiated, n (%)                                                                         | 0/752 (0.0)             | 0/557 (0.0)          | 0/74 (0.0)          | 0/113 (0.0)                 | 1/332 (0.3)           |

## DISCUSSION

This study establishes the magnitude of the detection gap for adults attending primary care in diverse LMIC settings. There were low levels of detection of depression from screen-positive participants in Ethiopia, Nepal, South Africa and Uganda and no detection in India. There was no detection of AUD among screen-positive participants outside Nepal and Uganda. Conversely, there was almost no evidence of mis- or over-diagnosis of depression or AUD among participants who screened negative.

The detection figures observed here are substantially lower than the average figures found by Mitchell et al. for detection of depression (47%) and for AUD (42%) by primary care providers in high income countries.[13,14] As studies of clinical detection in LMIC settings were not available for these meta-analyses, this study fills a key gap in our understanding of the detection gap globally. The consistency of findings across these 5 diverse settings likely provides insight across LMIC settings generally. The health service organisations in this study varied considerably in catchment size, services offered and provider types (Table 1), and facility attendees varied considerably by age, sex, educational attainment and symptom severity (Table 5). Yet detection was consistently poor. These findings provide insight into how the population-level treatment gap in LMIC is at least partially attributable to a facility-level detection gap.

While detection levels were low, the facility-level treatment gap approached 100% in most settings. The treatment outcome definitions used here were broad and included provision of advice or referrals to specialist care, both of which clinicians were able to dispense prior to implementation of the PRIME mental health care plans. The first barrier for providing treatment at the health facility is detection, and, as reported above, across all settings detection levels were extremely low. The findings of this study indicate consistent missed opportunities for providing evidence-based care across these diverse LMIC settings. Improving clinical detection and treatment of depression and AUD by primary care providers remains an area where intervention development is required; the PRIME consortium will evaluate its own interventions – the plans for which have described in detail [34–38] - in follow-ups to this report.

The PRIME Facility Detection study uses widely-validated screening tools to identify probable cases. While diagnostic interviews are the gold standard for identifying cases, screening tools are usable by trained interviewers rather than clinicians, and so the methods

1  
2  
3 used here are more easily replicable for monitoring and evaluation activities in other LMIC  
4 settings. Our outcome data were collected directly from the participants and clinicians rather  
5 than from a health management information system, which is also a replicable monitoring  
6 method for LMIC settings.  
7  
8

9  
10 There are several limitations to our study. First, screening tools (PHQ-9 and AUDIT) were  
11 used to identify probable cases of depression and AUD; an unknown number of screen-  
12 positive cases are actually false positive cases. Further, a 100% detection figure is not a  
13 desirable goal, as it indicates diagnosis among false positive cases. Screening  
14 misclassification is likely to be similar in the follow-up round, and so the denominators for  
15 detection and treatment are equally biased across rounds and allows a valid comparison  
16 across time to be made. Second, non-random sampling was used to select patients in some  
17 countries. While the samples may not be representative of the facility-attending population,  
18 the same sampling plan will be used in follow up rounds, enabling valid comparisons for the  
19 study's primary findings. And, given the non-random sampling and use of screening tools it  
20 is not appropriate to interpret the proportions of participants who screen positive as  
21 prevalence figures for cross-country comparisons. The loss to follow-up for screen-positive  
22 participants in Nepal, South Africa and Uganda could result in biased findings, as the  
23 diagnostic characteristics of lost participants is unknown.  
24  
25

26  
27 A third limitation concerns the outcome definitions for detection and treatment. Given the  
28 limitations of using patient- and clinician-reported data, with issues around recall and  
29 specificity, we opted to use extremely sensitive yet non-specific thresholds of evidence for  
30 coding detection or treatment as having occurred. The detection and treatment figures  
31 reported here should therefore be regarded as the upper bound of possibility: some of those  
32 coded as having been detected with depression may have other mental health disorders, and  
33 some of those coded as having treatment may not have what is considered to be minimally-  
34 adequate evidence-based care. Again, the bias due to these misclassifications will be equal in  
35 the follow up round. Use of cross-country coding criteria facilitates comparisons across  
36 diverse settings, and in future reports each country can use these criteria and/or develop their  
37 own more locally-appropriate and specific criteria. This process has been completed in Sodo  
38 District, Ethiopia, where detection outcomes have been reported separately for using specific  
39 criteria for depression and non-specific criteria for common mental disorder.[39]  
40  
41  
42  
43  
44  
45  
46  
47  
48  
49  
50  
51  
52  
53  
54  
55  
56  
57  
58  
59  
60



1  
2  
3 We plan to repeat this survey in each of the implementation sites. By comparing the baseline  
4 versus follow-up figures within each country, we will be able to determine whether the level  
5 of detection and level of initiation of evidence-based treatment for depression and for AUD  
6 has increased after implementing mental health care plans. Further to this we will compare  
7 the change in detection among probable non-cases (Table 7), which is an indicator of  
8 inappropriate diagnosis; district health manager can use two detection figures to recalibrate  
9 their training and supervision systems. Also using follow up data, we will also be able to  
10 assess whether the improved detection and improved treatment provision is equitable by age,  
11 sex and other socio-economic factors. And, with the help of Theory of Change framework  
12 and process evaluation data collected over the implementation phase,[17] we will try to  
13 explain the reasons for improvement/non-improvement of detection and initiation of  
14 treatment for depression and for AUD, along identifying with the factors relating to detection.  
15 As each country developed its own Theory of Change framework, it will be possible to  
16 contrast five frameworks with five sets of follow-up findings, and then to identify the  
17 essential characteristics of an effective strategy to improve detection.  
18  
19  
20  
21  
22  
23  
24  
25  
26

27  
28 Further research can identify the patient-, clinician- and system-level characteristics  
29 associated with detection, as a means of further refining interventions. Some of these  
30 characteristics are already potential targets for intervention, and have been identified in  
31 previous studies: On the patient level, those who have higher level of perceived need[40] and  
32 lower levels of internalized stigma[13,14] are more likely to receive a diagnosis. On the  
33 clinician level, detection improves with longer consultation time,[41,42] adequate training, a  
34 stronger therapeutic alliance,[13] and with contractual incentives.[43] And on the health-  
35 system level, detection is likely to improve with the availability of medications and health  
36 providers at PHC level who have the authority to prescribe psychotropic medication, as well  
37 as referral pathways to counsellors. Also important are buy-in and support from leadership  
38 who give priority to mental health[1], governance and supervisory structures to develop and  
39 execute standardized protocols,[44] and a functional health management information  
40 system[45] to monitor and feed back on clinical activity. A combination of these patient-,  
41 clinician- and system- level characteristics may explain some of the substantially lower  
42 detection figures for depression and AUD found here from our LMIC settings compared to  
43 those found in meta-analyses by Mitchell et al. in HIC settings.  
44  
45  
46  
47  
48  
49  
50  
51  
52  
53

## 54 **Conclusion**

55  
56  
57  
58  
59  
60

1  
2  
3 The findings of this study suggest large detection and treatment gaps for adult primary care  
4 patients, which are likely contributors to the population-level mental health treatment gap in  
5 LMIC. Primary care centres remain unfulfilled intervention points for reducing the  
6 population-level burden of disease in LMIC.  
7  
8  
9  
10  
11  
12  
13  
14  
15  
16  
17  
18  
19  
20  
21  
22  
23  
24  
25  
26  
27  
28  
29  
30  
31  
32  
33  
34  
35  
36  
37  
38  
39  
40  
41  
42  
43  
44  
45  
46  
47  
48  
49  
50  
51  
52  
53  
54  
55  
56  
57  
58  
59  
60

For peer review only

## Funding

This study is an output of the PRogramme for Improving Mental health carE (PRIME). The material has been funded by UKaid from the UK Government (Department of International Development), however the views expressed do not necessarily reflect the UK Government's official policies. The funders had no role in study design, data collection and analysis, decision to publish, or preparation of the manuscript.

## Competing interests

None declared

## Authors contributions

**Conceptualization** SDR, MJ, IP, FK, JN, CL, AF, RS

**Design** SDR, TR, GM, NPL, AB, IP, FK, JN, CL, AF, RS

**Data acquisition** TR, GM, VM, SS, NPL, OS, JS

**Data analysis** SDR

**Data interpretation** SDR, CL, RS

**Drafting** SDR, TR, CL, RS

**Critical revision** GM, VM, SS, NPL, OS, JS, MJ, AB, IP, FK, JN, CL, AF, RS

**Final approval** SDR, TR, GM, VM, SS, NPL, OS, JS, MJ, AB, IP, FK, JN, CL, AF, RS

**Accountability** SDR, TR, GM, VM, SS, NPL, OS, JS, MJ, AB, IP, FK, JN, CL, AF, RS

**Data sharing statement:** Statistical code (Stata) is available as supplementary material. While we cannot make the dataset publicly available, we will consider all request to provide a minimal dataset to interested researchers via the PRIME consortium Expression of interest form here: <http://www.prime.uct.ac.za/contact-us>.

## Acknowledgments

1  
2  
3 Thanks to Katamba Mutyaba, Nabukko Sarah, Kirangi Juliet, Kasiiri Joweria, Namwase  
4 Suzan and Mwebesa Julius in Uganda; Tasneem Kathree, Palesa Mothibedi, Primrose  
5 Mathakga and Deanna Carter in South Africa; Anup Adhikari in Nepal; and the study  
6 participants.  
7  
8  
9  
10  
11  
12  
13  
14  
15  
16  
17  
18  
19  
20  
21  
22  
23  
24  
25  
26  
27  
28  
29  
30  
31  
32  
33  
34  
35  
36  
37  
38  
39  
40  
41  
42  
43  
44  
45  
46  
47  
48  
49  
50  
51  
52  
53  
54  
55  
56  
57  
58  
59  
60

## REFERENCES

- 1 Patel V, Chisholm D, Parikh R, *et al.* Addressing the burden of mental, neurological, and substance use disorders: key messages from Disease Control Priorities , 3rd edition. *The Lancet* 2016;**387**:1672–85. doi:10.1016/S0140-6736(15)00390-6
- 2 Liu NH, Daumit GL, Dua T, *et al.* Excess mortality in persons with severe mental disorders: a multilevel intervention framework and priorities for clinical practice, policy and research agendas. *World Psychiatry* 2017;**16**:30–40. doi:10.1002/wps.20384
- 3 Bloom D, Cafiero E, Jané-Llopis E, *et al.* The Global Economic Burden of Noncommunicable Diseases. Geneva: : World Economic Forum 2011. www.weforum.org/EconomicsOfNCD
- 4 Whiteford HA, Degenhardt L, Rehm J, *et al.* Global burden of disease attributable to mental and substance use disorders: findings from the Global Burden of Disease Study 2010. *The Lancet* 2013;**382**:1575–1586.
- 5 Rathod SD, De Silva MJ, Ssebunnya J, *et al.* Treatment Contact Coverage for Probable Depressive and Probable Alcohol Use Disorders in Four Low- and Middle-Income Country Districts: The PRIME Cross-Sectional Community Surveys. *PLoS One* 2016;**11**:e0162038. doi:10.1371/journal.pone.0162038
- 6 Dua T, Barbui C, Clark N, *et al.* Evidence-Based Guidelines for Mental, Neurological, and Substance Use Disorders in Low- and Middle-Income Countries: Summary of WHO Recommendations. *PLoS Med* 2011;**8**:e1001122. doi:10.1371/journal.pmed.1001122
- 7 World Health Organization. mhGAP Intervention Guide - Version 2.0 for mental, neurological and substance use disorders in non-specialized health settings. Geneva: : World Health Organization 2016.
- 8 Regier DA, Narrow WE, Rae DS, *et al.* The de facto US mental and addictive disorders service system. Epidemiologic catchment area prospective 1-year prevalence rates of disorders and services. *Arch Gen Psychiatry* 1993;**50**:85–94.
- 9 Simon GE, VonKorff M. Recognition, management, and outcomes of depression in primary care. *Arch Fam Med* 1995;**4**:99–105.
- 10 Prince M, Patel V, Saxena S, *et al.* No health without mental health. *The Lancet* 2007;**370**:859–77. doi:10.1016/S0140-6736(07)61238-0
- 11 Moussavi S, Chatterji S, Verdes E, *et al.* Depression, chronic diseases, and decrements in health: results from the World Health Surveys. *The Lancet* 2007;**370**:851–8. doi:10.1016/S0140-6736(07)61415-9
- 12 Patel V, Belkin GS, Chockalingam A, *et al.* Grand Challenges: Integrating Mental Health Services into Priority Health Care Platforms. *PLoS Med* 2013;**10**:e1001448. doi:10.1371/journal.pmed.1001448
- 13 Mitchell AJ, Vaze A, Rao S. Clinical diagnosis of depression in primary care: a meta-analysis. *The Lancet* 2009;**374**:609–19.

- 14 Mitchell AJ, Meader N, Bird V, *et al.* Clinical recognition and recording of alcohol disorders by clinicians in primary and secondary care: meta-analysis. *Br J Psychiatry* 2012;**201**:93–100. doi:10.1192/bjp.bp.110.091199
- 15 Lund C, Tomlinson M, De Silva M, *et al.* PRIME: A Programme to Reduce the Treatment Gap for Mental Disorders in Five Low- and Middle-Income Countries. *PLoS Med* 2012;**9**:e1001359. doi:10.1371/journal.pmed.1001359
- 16 Hanlon C, Luitel NP, Kathree T, *et al.* Challenges and Opportunities for Implementing Integrated Mental Health Care: A District Level Situation Analysis from Five Low- and Middle-Income Countries. *PLoS ONE* 2014;**9**:e88437. doi:10.1371/journal.pone.0088437
- 17 De Silva MJ, Rathod SD, Hanlon C, *et al.* Evaluation of district mental healthcare plans: the PRIME consortium methodology. *Br J Psychiatry* 2015;**208**:s63–70. doi:10.1192/bjp.bp.114.153858
- 18 Babor TF, Higgins-Biddle JC, Saunders JB, *et al.* AUDIT: The Alcohol Use Disorders Identification Test Guidelines for Use in Primary Care. Geneva, Switzerland: : World Health Organization 2001.
- 19 Robins LN, Wing MD, Helzer MD, *et al.* The composite international diagnostic interview. *Arch Gen Psychiatry* 1988;**45**:1069–1077.
- 20 Clement S, Brohan E, Jeffery D, *et al.* Development and psychometric properties the Barriers to Access to Care Evaluation scale (BACE) related to people with mental ill health. *BMC Psychiatry* 2012;**12**:36. doi:10.1186/1471-244X-12-36
- 21 Kroenke K, Spitzer RL, Williams JBW. The PHQ-9: Validity of a brief depression severity measure. *J Gen Intern Med* 2001;**16**:606–13. doi:10.1046/j.1525-1497.2001.016009606.x
- 22 Üstün TB, Kostanjsek N, Chatterji S, *et al.*, editors. *Measuring health and disability: manual for WHO Disability Assessment Schedule WHODAS 2.0*. Geneva: : World Health Organization 2010.
- 23 Hanlon C, Medhin G, Selamu M, *et al.* Validity of brief screening questionnaires to detect depression in primary care in Ethiopia. *J Affect Disord* 2015;**186**:32–9. doi:10.1016/j.jad.2015.07.015
- 24 Kohrt BA, Luitel NP, Acharya P, *et al.* Detection of depression in low resource settings: validation of the Patient Health Questionnaire (PHQ-9) and cultural concepts of distress in Nepal. *BMC Psychiatry* 2016;**16**. doi:10.1186/s12888-016-0768-y
- 25 Patel V, Araya R, Chowdhary N, *et al.* Detecting common mental disorders in primary care in India: a comparison of five screening questionnaires. *Psychol Med* 2008;**38**. doi:10.1017/S0033291707002334
- 26 Bhana A, Rathod SD, Selohilwe O, *et al.* The validity of the Patient Health Questionnaire for screening depression in chronic care patients in primary health care in South Africa. *BMC Psychiatry* 2015;**15**:118. doi:10.1186/s12888-015-0503-0

- 1  
2  
3 27 Nakku E, Rathod S, Kizza D, *et al.* Validity and diagnostic accuracy of the Luganda  
4 version of the 9-Item and 2-Item Patient Health Questionnaire for detecting major  
5 depressive disorder in rural Uganda. *Glob Ment Health* Published Online First: 2016.  
6 doi:10.1017/gmh.2026.14  
7
- 8 28 Nayak MB, Bond JC, Cherpitel C, *et al.* Detecting Alcohol-Related Problems in  
9 Developing Countries: A Comparison of 2 Screening Measures in India. *Alcohol Clin*  
10 *Exp Res* 2009;**33**:2057–66. doi:10.1111/j.1530-0277.2009.01045.x  
11
- 12 29 Pradhan B, Chappuis F, Baral D, *et al.* The alcohol use disorders identification test  
13 (AUDIT): validation of a Nepali version for the detection of alcohol use disorders and  
14 hazardous drinking in medical settings. *Subst Abuse Treat Prev Policy* 2012;**7**:42.  
15 doi:10.1186/1747-597X-7-42  
16
- 17 30 Myer L, Smit J, Roux LL, *et al.* Common Mental Disorders among HIV-Infected  
18 Individuals in South Africa: Prevalence, Predictors, and Validation of Brief Psychiatric  
19 Rating Scales. *AIDS Patient Care STDs* 2008;**22**:147–58. doi:10.1089/apc.2007.0102  
20
- 21 31 Saunders JB, Aasland OG, Babor TF, *et al.* Development of the Alcohol Use Disorders  
22 Identification Test (AUDIT): WHO Collaborative Project on Early Detection of Persons  
23 with Harmful Alcohol Consumption-II. *Addiction* 1993;**88**:791–804. doi:10.1111/j.1360-  
24 0443.1993.tb02093.x  
25
- 26 32 Chishinga N, Kinyanda E, Weiss HA, *et al.* Validation of brief screening tools for  
27 depressive and alcohol use disorders among TB and HIV patients in primary care in  
28 Zambia. *BMC Psychiatry* 2011;**11**. doi:10.1186/1471-244X-11-75  
29
- 30 33 Breuer E, De Silva MJ, Shidaye R, *et al.* Planning and evaluating mental health services  
31 in low- and middle-income countries using theory of change. *Br J Psychiatry* Published  
32 Online First: 7 October 2015. doi:10.1192/bjp.bp.114.153841  
33
- 34 34 Fekadu A, Hanlon C, Medhin G, *et al.* Development of a scalable mental healthcare plan  
35 for a rural district in Ethiopia. *Br J Psychiatry* 2016;**208**:s4–12.  
36 doi:10.1192/bjp.bp.114.153676  
37
- 38 35 Shidhaye R, Shrivastava S, Murhar V, *et al.* Development and piloting of a plan for  
39 integrating mental health in primary care in Sehore district, Madhya Pradesh, India. *Br J*  
40 *Psychiatry* 2016;**208**:s13–20. doi:10.1192/bjp.bp.114.153700  
41
- 42 36 Jordans MJD, Luitel NP, Pokhrel P, *et al.* Development and pilot testing of a mental  
43 healthcare plan in Nepal. *Br J Psychiatry* 2016;**208**:s21–8.  
44 doi:10.1192/bjp.bp.114.153718  
45
- 46 37 Petersen I, Fairall L, Bhana A, *et al.* Integrating mental health into chronic care in South  
47 Africa: the development of a district mental healthcare plan. *Br J Psychiatry*  
48 2016;**208**:s29–39. doi:10.1192/bjp.bp.114.153726  
49
- 50 38 Kigozi FN, Kizza D, Nakku J, *et al.* Development of a district mental healthcare plan in  
51 Uganda. *Br J Psychiatry* 2016;**208**:s40–6. doi:10.1192/bjp.bp.114.153742  
52
- 53 39 Fekadu A, Medhin G, Selamu M, *et al.* Recognition of depression by primary care  
54 clinicians in rural Ethiopia. *BMC Fam Pract* 2017;**18**. doi:10.1186/s12875-017-0628-y  
55  
56  
57  
58  
59

- 1  
2  
3 40 Young AS, Klap R, Sherbourne CD, *et al.* The Quality of Care for Depressive and  
4 Anxiety Disorders in the United States. *Arch Gen Psychiatry* 2001;**58**:55.  
5 doi:10.1001/archpsyc.58.1.55  
6  
7 41 Hutton C, Gunn J. Do longer consultations improve the management of psychological  
8 problems in general practice? A systematic literature review. *BMC Health Serv Res*  
9 2007;**7**. doi:10.1186/1472-6963-7-71  
10  
11 42 Irving G, Neves AL, Dambha-Miller H, *et al.* International variations in primary care  
12 physician consultation time: a systematic review of 67 countries. *BMJ Open*  
13 2017;**7**:e017902. doi:10.1136/bmjopen-2017-017902  
14  
15 43 van Dijk CE, Verheij RA, Spreeuwenberg P, *et al.* Impact of remuneration on guideline  
16 adherence: Empirical evidence in general practice. *Scand J Prim Health Care*  
17 2013;**31**:56–63. doi:10.3109/02813432.2012.757078  
18  
19 44 Petersen I, Marais D, Abdulmalik J, *et al.* Strengthening mental health system  
20 governance in six low- and middle-income countries in Africa and South Asia:  
21 challenges, needs and potential strategies. *Health Policy Plan* 2017;**32**:699–709.  
22 doi:10.1093/heapol/czx014  
23  
24 45 Upadhaya N, Jordans MJD, Abdulmalik J, *et al.* Information systems for mental health in  
25 six low and middle income countries: cross country situation analysis. *Int J Ment Health*  
26 *Syst* 2016;**10**. doi:10.1186/s13033-016-0094-2  
27  
28  
29  
30  
31  
32  
33  
34  
35  
36  
37  
38  
39  
40  
41  
42  
43  
44  
45  
46  
47  
48  
49  
50  
51  
52  
53  
54  
55  
56  
57  
58  
59  
60



1  
2  
3  
4  
5  
6  
7  
8  
9  
10  
11  
12  
13  
14  
15  
16  
17  
18  
19  
20  
21  
22  
23  
24  
25  
26  
27  
28  
29  
30  
31  
32  
33  
34  
35  
36  
37  
38  
39  
40  
41  
42  
43  
44  
45  
46

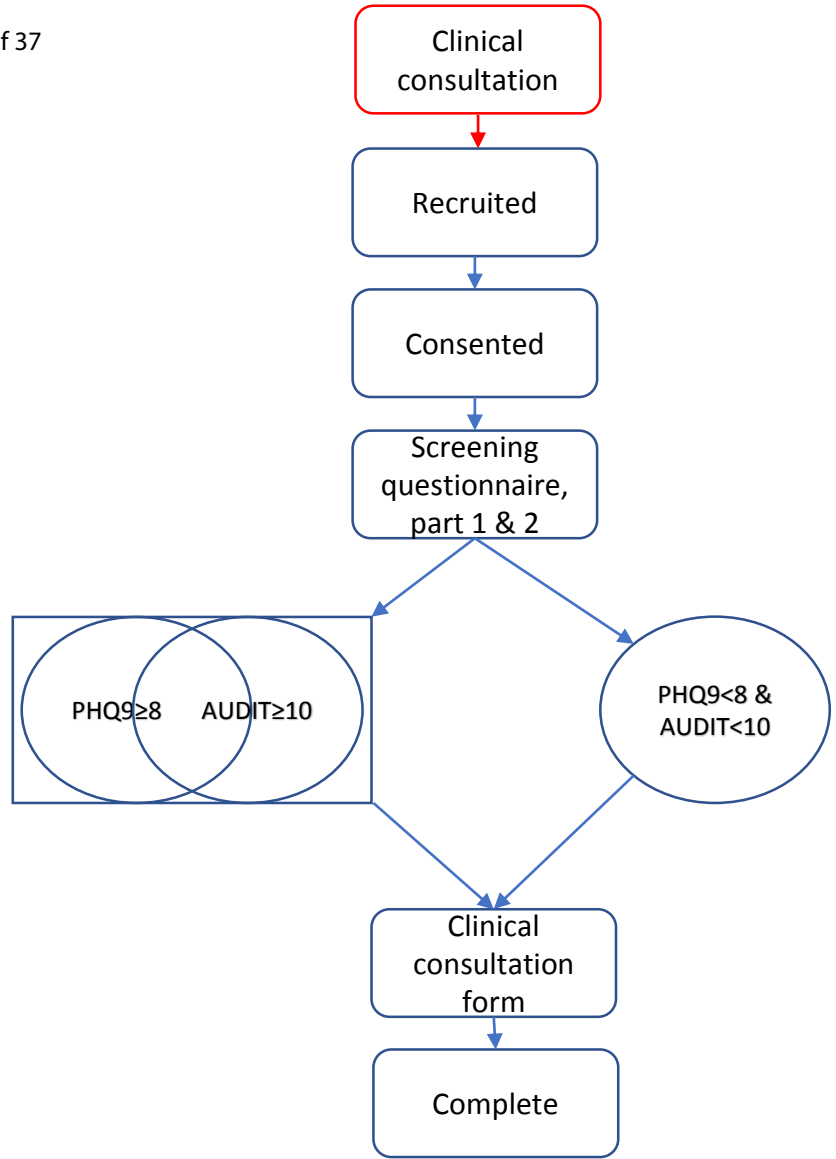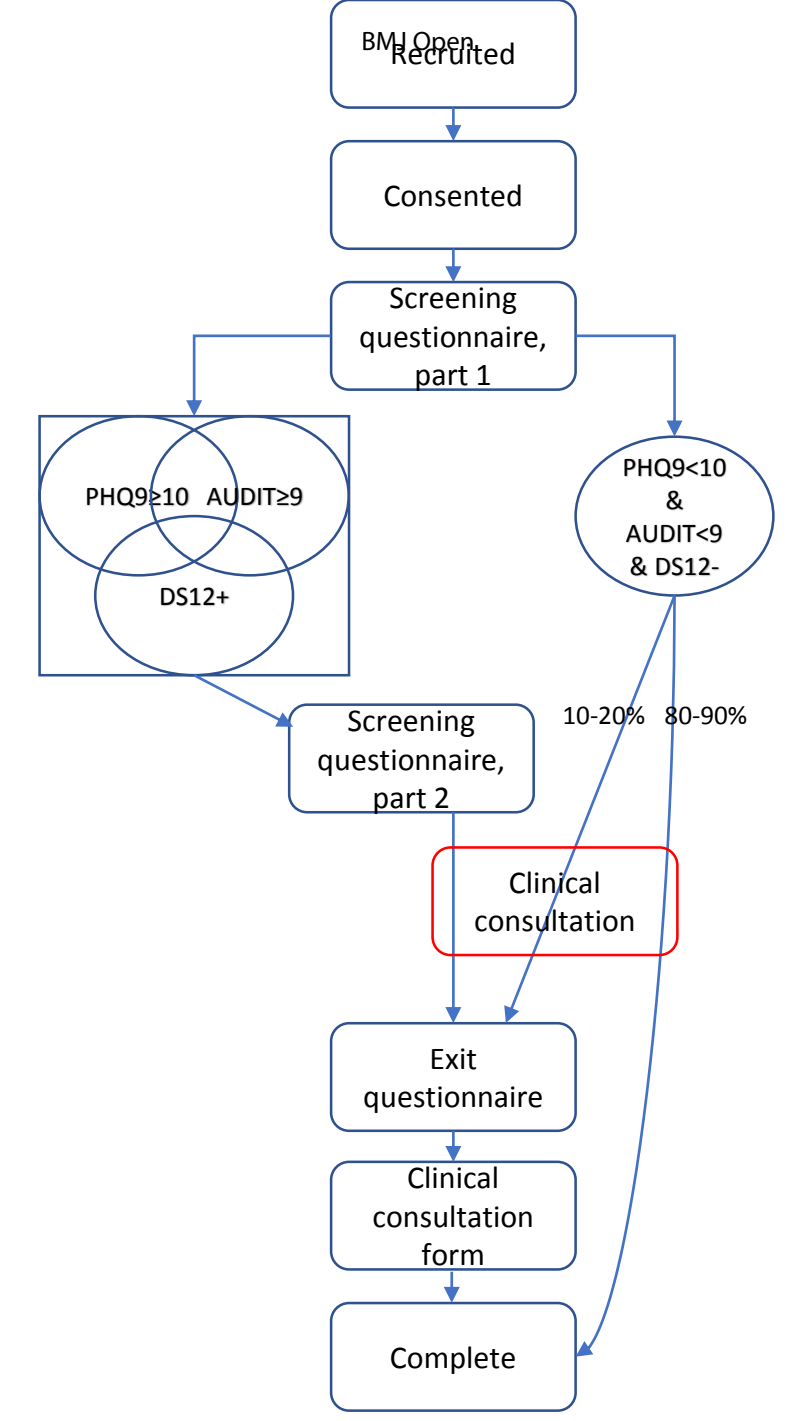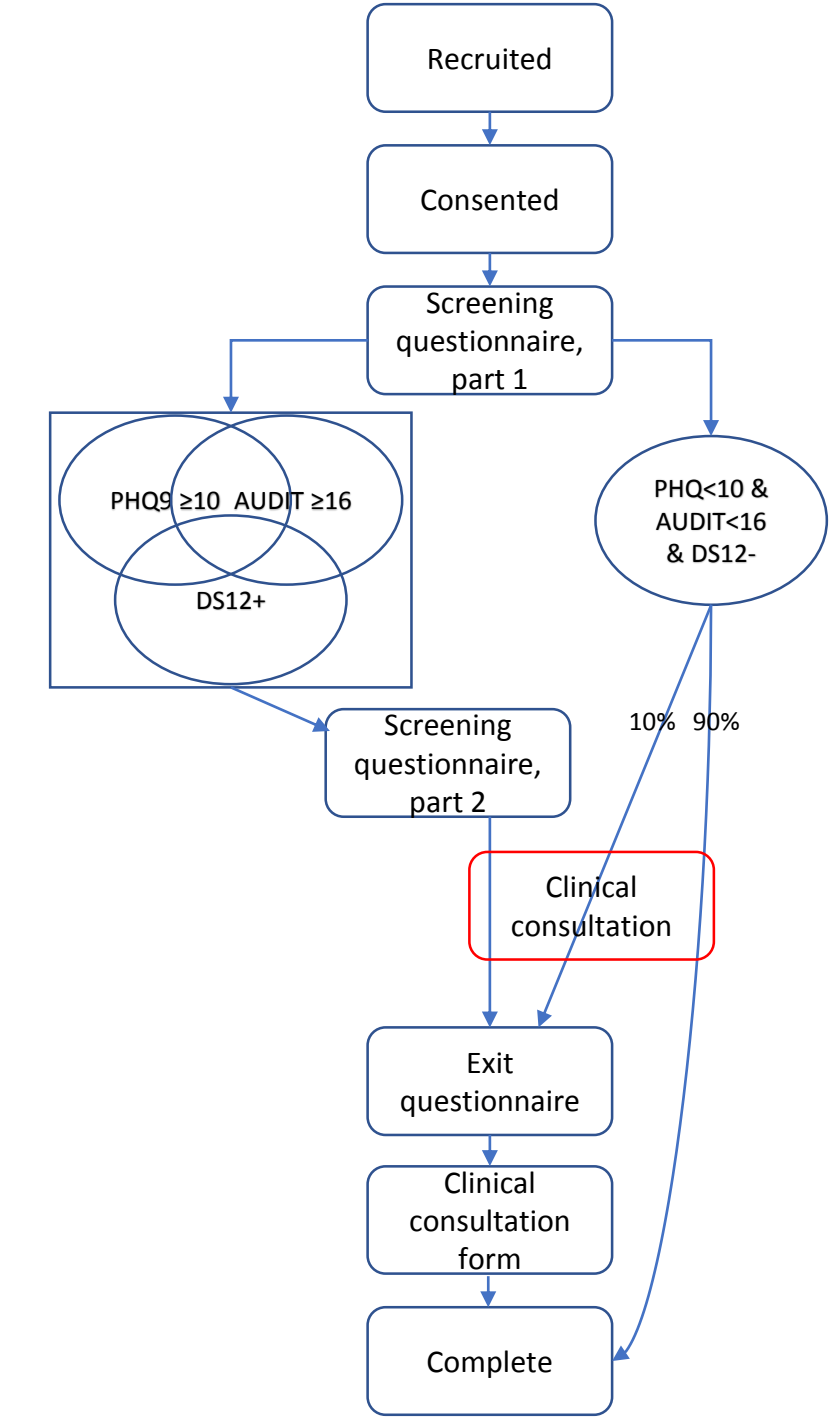

```
1
2
3 *****
4 *** Baseline FDS & Methods ***
5 *****
6 use "C:\PRIME\FDS\UCT\FDS.dta" if round==1, clear
7     keep country cname idate _screenexit _dxtx ///
8         age sex educ_3c emp ///
9         phq? totalphq phqpos dephis aud? aud10 totalaud audpos aud_5c ///
10        detect_* treat_* medname*
11
12        drop if mi(sex)
13        table country, c(N idate min idate max idate)
14
15        bysort country: alpha phq?, item
16        mvencode aud1-aud10, mv(.=0) over
17        bysort country: alpha aud1-aud10, item
18
19 *****
20 *** TABLE 1 ***
21 *****
22     * Number of FDS clinics per country
23     bysort country: distinct cname
24     * Drop Nepal clinics which got training before baseline
25     drop if cname==36 | cname==37
26
27 *****
28 *** TABLE 2 ***
29 *****
30     * Age
31     tabstat age, by(country) col(stat) stat(n p50 p25 p75) f(%9.3g)
32     * % Female
33     tab sex country, col
34     * Education
35     tab educ_3c country, col
36     * Employment - propose using unemployed/non-income/income
37     * tab emp country, col nolabel
38
39
40
41
42
43
44
45
46
```

1  
2  
3  
4  
5  
6  
7  
8  
9  
10  
11  
12  
13  
14  
15  
16  
17  
18  
19  
20  
21  
22  
23  
24  
25  
26  
27  
28  
29  
30  
31  
32  
33  
34  
35  
36  
37  
38  
39  
40  
41  
42  
43  
44  
45  
46

\*\*\*\*\*  
 \*\*\* TABLE 6 \*\*\*  
 \*\*\*\*\*

```

* DEPRESSION
* Median PHQ9 score
tabstat totalphq, by(country) col(stat) stat(n p50 p25 p75) f(%9.3g)
* PHQ9+ screening cut off score
table country phqpos, c(min totalphq max totalphq)
* PHQ9+ proportion
table country, c(n phqpos sum phqpos mean phqpos) f(%9.3g)
tab country dephis, row
* PHQ9+ proportion and 95% CI
* prop phqpos, over(country)
* Retained for exit interview
tab country _screenexit if phqpos, m
* Dx Tx for PHQ9+
foreach var of varlist detect_dd treat_dd {
    tab country `var' if phqpos==1 & _screenexit!=1, row
    prop `var' if phqpos==1 & _screenexit!=1, over(country)
}
* ALCOHOL
* Mean AUDIT
tabstat totalaud, by(country) col(stat) stat(n p50 p25 p75) f(%9.3g)
* AUDIT cut off score
table country audpos, c(min totalaud max totalaud)
* AUDIT+ proportion
table country, c(n audpos sum audpos mean audpos) f(%9.3g)
* Abstinent and dependent proportions
tab aud_5c country, col
* AUDIT+ proportion and 95% CI
* prop audpos, over(country)
* Retained for exit interview
tab country _screenexit if audpos, m
* Dx Tx for AUDIT+
table country if audpos==1 & _screenexit!=1, c(freq sum detect_aud mean detect_aud sum treat_aud mean treat_aud) f(%9.3g)
prop detect_aud treat_aud if audpos==1 & _screenexit!=1, over(country)

```

```
1
2
3 *****
4 *** TABLE 7 ***
5 *****
6     * Screen negatives
7     mrtab phqpos dephis audpos, by(country) incl
8     foreach var of varlist detect_dd treat_dd detect_aud treat_aud {
9         tab country `var' if phqpos!=1 & audpos!=1 & dephis!=1, row
10        }
11
12
13
14
15
16
17
18
19
20
21
22
23
24
25
26
27
28
29
30
31
32
33
34
35
36
37
38
39
40
41
42
43
44
45
46
```

For peer review only

**STROBE 2007 (v4) Statement—Checklist of items that should be included in reports of *cross-sectional studies***

| Section/Topic             | Item # | Recommendation                                                                                                                                                                       | Reported on page # |
|---------------------------|--------|--------------------------------------------------------------------------------------------------------------------------------------------------------------------------------------|--------------------|
| Title and abstract        | 1      | (a) Indicate the study’s design with a commonly used term in the title or the abstract                                                                                               | 1                  |
|                           |        | (b) Provide in the abstract an informative and balanced summary of what was done and what was found                                                                                  | 3                  |
| <b>Introduction</b>       |        |                                                                                                                                                                                      |                    |
| Background/rationale      | 2      | Explain the scientific background and rationale for the investigation being reported                                                                                                 | 5                  |
| Objectives                | 3      | State specific objectives, including any prespecified hypotheses                                                                                                                     | 5                  |
| <b>Methods</b>            |        |                                                                                                                                                                                      |                    |
| Study design              | 4      | Present key elements of study design early in the paper                                                                                                                              | 6                  |
| Setting                   | 5      | Describe the setting, locations, and relevant dates, including periods of recruitment, exposure, follow-up, and data collection                                                      | 6                  |
| Participants              | 6      | (a) Give the eligibility criteria, and the sources and methods of selection of participants                                                                                          | 11                 |
| Variables                 | 7      | Clearly define all outcomes, exposures, predictors, potential confounders, and effect modifiers. Give diagnostic criteria, if applicable                                             | 15                 |
| Data sources/ measurement | 8*     | For each variable of interest, give sources of data and details of methods of assessment (measurement). Describe comparability of assessment methods if there is more than one group | 11                 |
| Bias                      | 9      | Describe any efforts to address potential sources of bias                                                                                                                            |                    |
| Study size                | 10     | Explain how the study size was arrived at                                                                                                                                            | 8                  |
| Quantitative variables    | 11     | Explain how quantitative variables were handled in the analyses. If applicable, describe which groupings were chosen and why                                                         | 16                 |
| Statistical methods       | 12     | (a) Describe all statistical methods, including those used to control for confounding                                                                                                | 16                 |
|                           |        | (b) Describe any methods used to examine subgroups and interactions                                                                                                                  |                    |
|                           |        | (c) Explain how missing data were addressed                                                                                                                                          | 16                 |
|                           |        | (d) If applicable, describe analytical methods taking account of sampling strategy                                                                                                   |                    |
|                           |        | (e) Describe any sensitivity analyses                                                                                                                                                |                    |
| <b>Results</b>            |        |                                                                                                                                                                                      |                    |

|                          |     |                                                                                                                                                                                                              |          |
|--------------------------|-----|--------------------------------------------------------------------------------------------------------------------------------------------------------------------------------------------------------------|----------|
| Participants             | 13* | (a) Report numbers of individuals at each stage of study—eg numbers potentially eligible, examined for eligibility, confirmed eligible, included in the study, completing follow-up, and analysed            | 19       |
|                          |     | (b) Give reasons for non-participation at each stage                                                                                                                                                         | 18       |
|                          |     | (c) Consider use of a flow diagram                                                                                                                                                                           | Figure 1 |
| Descriptive data         | 14* | (a) Give characteristics of study participants (eg demographic, clinical, social) and information on exposures and potential confounders                                                                     | 17       |
|                          |     | (b) Indicate number of participants with missing data for each variable of interest                                                                                                                          | 18       |
| Outcome data             | 15* | Report numbers of outcome events or summary measures                                                                                                                                                         | 19       |
| Main results             | 16  | (a) Give unadjusted estimates and, if applicable, confounder-adjusted estimates and their precision (eg, 95% confidence interval). Make clear which confounders were adjusted for and why they were included | 19       |
|                          |     | (b) Report category boundaries when continuous variables were categorized                                                                                                                                    |          |
|                          |     | (c) If relevant, consider translating estimates of relative risk into absolute risk for a meaningful time period                                                                                             |          |
| Other analyses           | 17  | Report other analyses done—eg analyses of subgroups and interactions, and sensitivity analyses                                                                                                               |          |
| <b>Discussion</b>        |     |                                                                                                                                                                                                              |          |
| Key results              | 18  | Summarise key results with reference to study objectives                                                                                                                                                     | 22       |
| Limitations              | 19  | Discuss limitations of the study, taking into account sources of potential bias or imprecision. Discuss both direction and magnitude of any potential bias                                                   | 23       |
| Interpretation           | 20  | Give a cautious overall interpretation of results considering objectives, limitations, multiplicity of analyses, results from similar studies, and other relevant evidence                                   | 22       |
| Generalisability         | 21  | Discuss the generalisability (external validity) of the study results                                                                                                                                        | 22       |
| <b>Other information</b> |     |                                                                                                                                                                                                              |          |
| Funding                  | 22  | Give the source of funding and the role of the funders for the present study and, if applicable, for the original study on which the present article is based                                                | 24       |

\*Give information separately for cases and controls in case-control studies and, if applicable, for exposed and unexposed groups in cohort and cross-sectional studies.

**Note:** An Explanation and Elaboration article discusses each checklist item and gives methodological background and published examples of transparent reporting. The STROBE checklist is best used in conjunction with this article (freely available on the Web sites of PLoS Medicine at <http://www.plosmedicine.org/>, Annals of Internal Medicine at <http://www.annals.org/>, and Epidemiology at <http://www.epidem.com/>). Information on the STROBE Initiative is available at [www.strobe-statement.org](http://www.strobe-statement.org).
