# Supplementary material for: Detection and treatment initiation for depression and alcohol use disorders: facility-based cross-sectional studies in five low-income and middle-income country districts
Source: PubMed Central journal article supplement — BMJ Open. 2018 Oct 10;8(10):e023421. doi: 10.1136/bmjopen-2018-023421 (PMC6252626; doi:10.1136/bmjopen-2018-023421), 2018-10-10
Supplement: bmjopen-2018-023421supp002.pdf [file bmjopen-2018-023421supp002.pdf]

\*\*\*\*\*

\*\*\* Baseline FDS & Methods \*\*\*

\*\*\*\*\*

```
use "C:\PRIME\FDS\UCT\FDS.dta" if round==1, clear
    keep country cname idate _screenexit _dxtx ///
        age sex educ_3c emp ///
        phq? totalphq phqpos dephis aud? aud10 totalaud audpos aud_5c ///
        detect_* treat_* medname*
```

```
drop if mi(sex)
table country, c(N idate min idate max idate)
```

```
bysort country: alpha phq?, item
mvencode aud1-aud10, mv(.=0) over
bysort country: alpha aud1-aud10, item
```

\*\*\*\*\*

\*\*\* TABLE 1 \*\*\*

\*\*\*\*\*

```
* Number of FDS clinics per country
bysort country: distinct cname
* Drop Nepal clinics which got training before baseline
drop if cname==36 | cname==37
```

\*\*\*\*\*

\*\*\* TABLE 2 \*\*\*

\*\*\*\*\*

```
* Age
tabstat age, by(country) col(stat) stat(n p50 p25 p75) f(%9.3g)
* % Female
tab sex country, col
* Education
tab educ_3c country, col
* Employment - propose using unemployed/non-income/income
* tab emp country, col nolabel
```

\*\*\*\*\*

\*\*\* TABLE 6 \*\*\*

\*\*\*\*\*

\* DEPRESSION

\* Median PHQ9 score

tabstat totalphq, by(country) col(stat) stat(n p50 p25 p75) f(%9.3g)

\* PHQ9+ screening cut off score

table country phqpos, c(min totalphq max totalphq)

\* PHQ9+ proportion

table country, c(n phqpos sum phqpos mean phqpos) f(%9.3g)

tab country dephis, row

\* PHQ9+ proportion and 95% CI

\* prop phqpos, over(country)

\* Retained for exit interview

tab country \_screenexit if phqpos, m

\* Dx Tx for PHQ9+

foreach var of varlist detect\_dd treat\_dd {

    tab country `var' if phqpos==1 & \_screenexit!=1, row

    prop `var' if phqpos==1 & \_screenexit!=1, over(country)

}

\* ALCOHOL

\* Mean AUDIT

tabstat totalaud, by(country) col(stat) stat(n p50 p25 p75) f(%9.3g)

\* AUDIT cut off score

table country audpos, c(min totalaud max totalaud)

\* AUDIT+ proportion

table country, c(n audpos sum audpos mean audpos) f(%9.3g)

\* Abstinent and dependent proportions

tab aud\_5c country, col

\* AUDIT+ proportion and 95% CI

\* prop audpos, over(country)

\* Retained for exit interview

tab country \_screenexit if audpos, m

\* Dx Tx for AUDIT+

table country if audpos==1 & \_screenexit!=1, c(freq sum detect\_aud mean detect\_aud sum treat\_aud mean treat\_aud) f(%9.3g)

prop detect\_aud treat\_aud if audpos==1 & \_screenexit!=1, over(country)

```
*****
```

```
*** TABLE 7 ***
```

```
*****
```

```
* Screen negatives
```

```
mrtab phqpos dephis audpos, by(country) incl
```

```
foreach var of varlist detect_dd treat_dd detect_aud treat_aud {
```

```
    tab country `var' if phqpos!=1 & audpos!=1 & dephis!=1, row
```

```
}
```
