# Supplementary figures and images for: Detection and treatment initiation for depression and alcohol use disorders: facility-based cross-sectional studies in five low-income and middle-income country districts
Source: PubMed Central journal article supplement — BMJ Open. 2018 Oct 10;8(10):e023421. doi: 10.1136/bmjopen-2018-023421 (PMC6252626; doi:10.1136/bmjopen-2018-023421), 2018-10-10

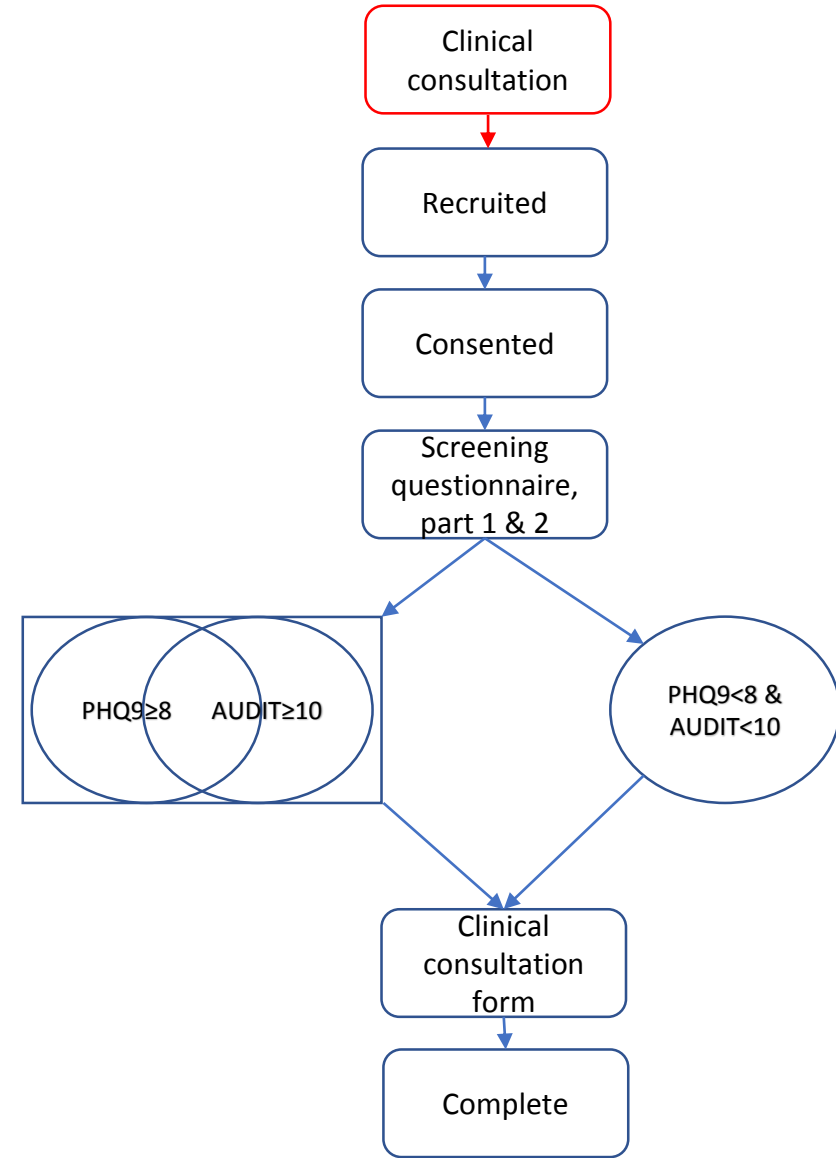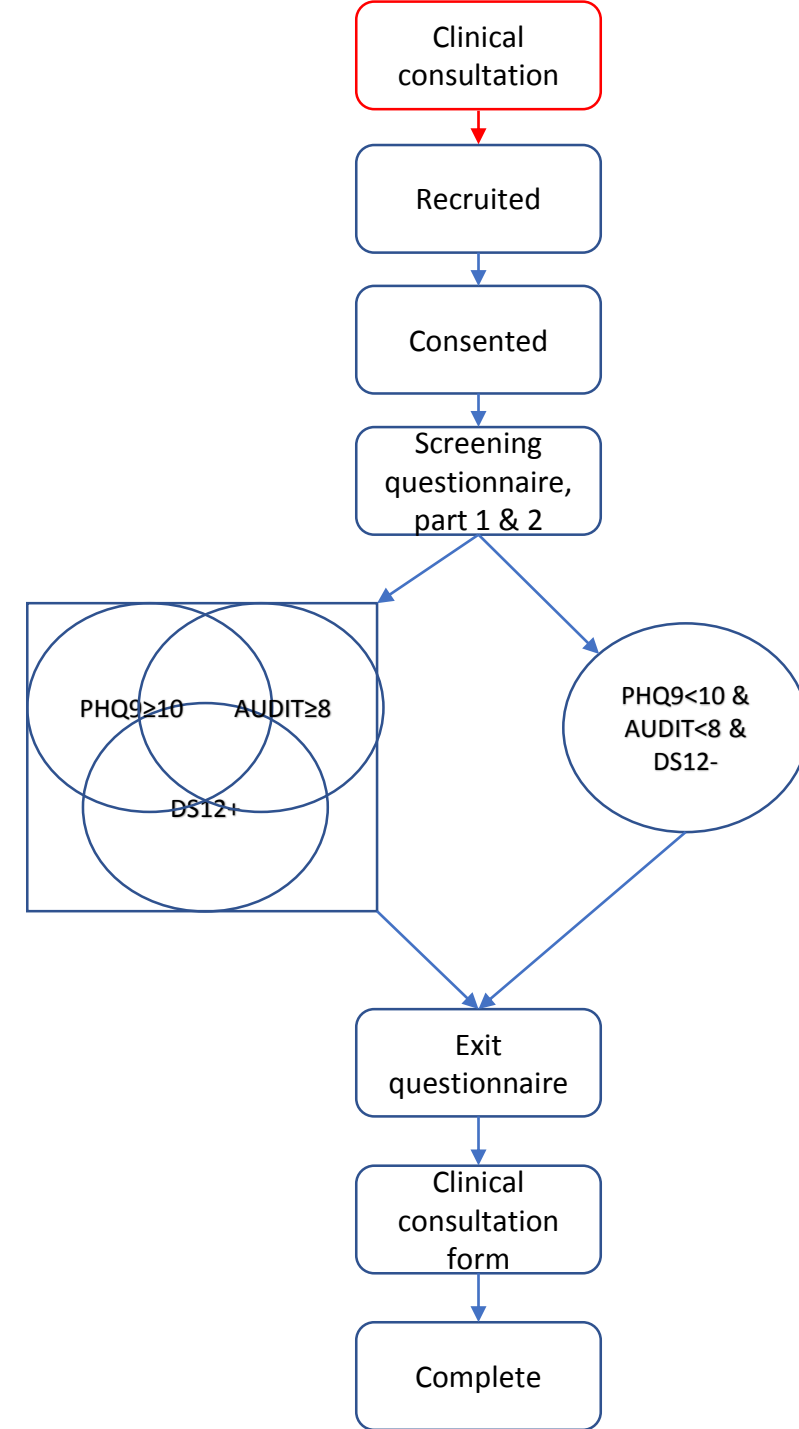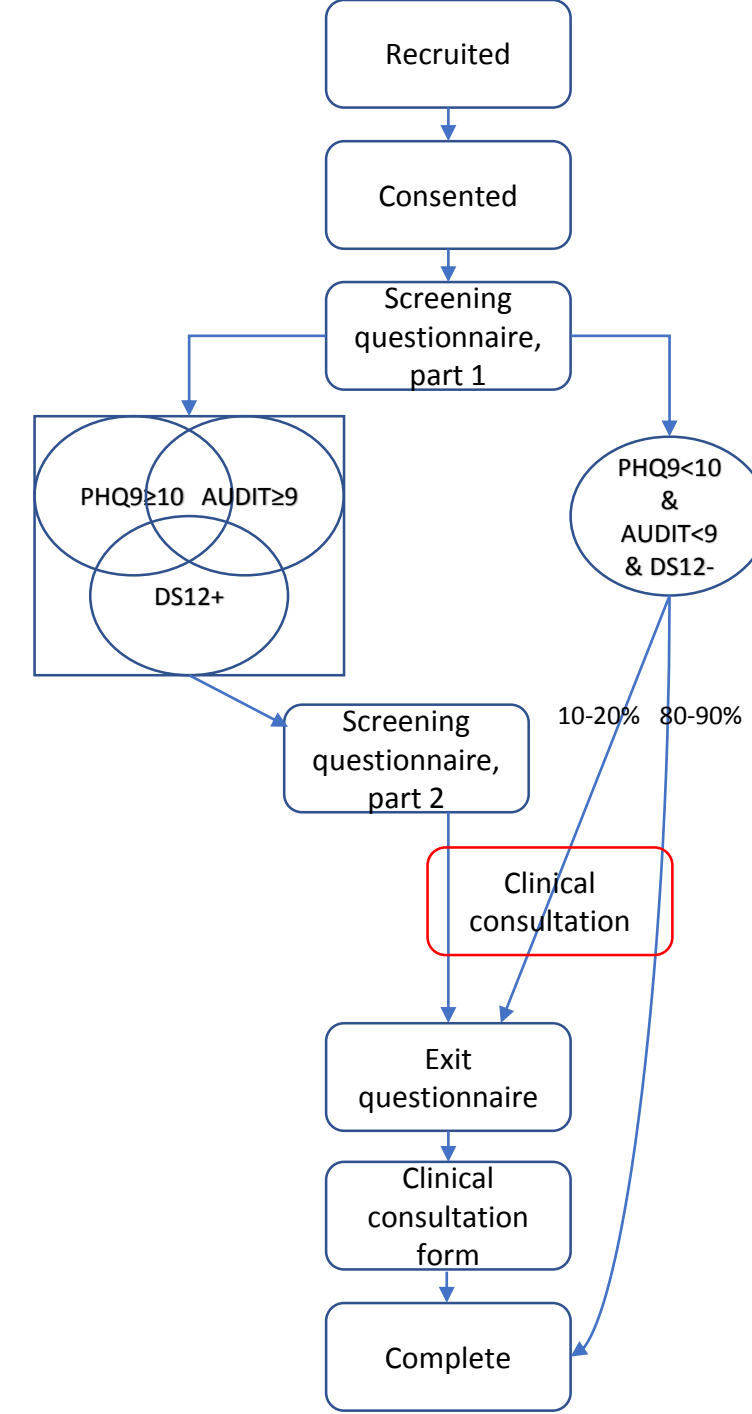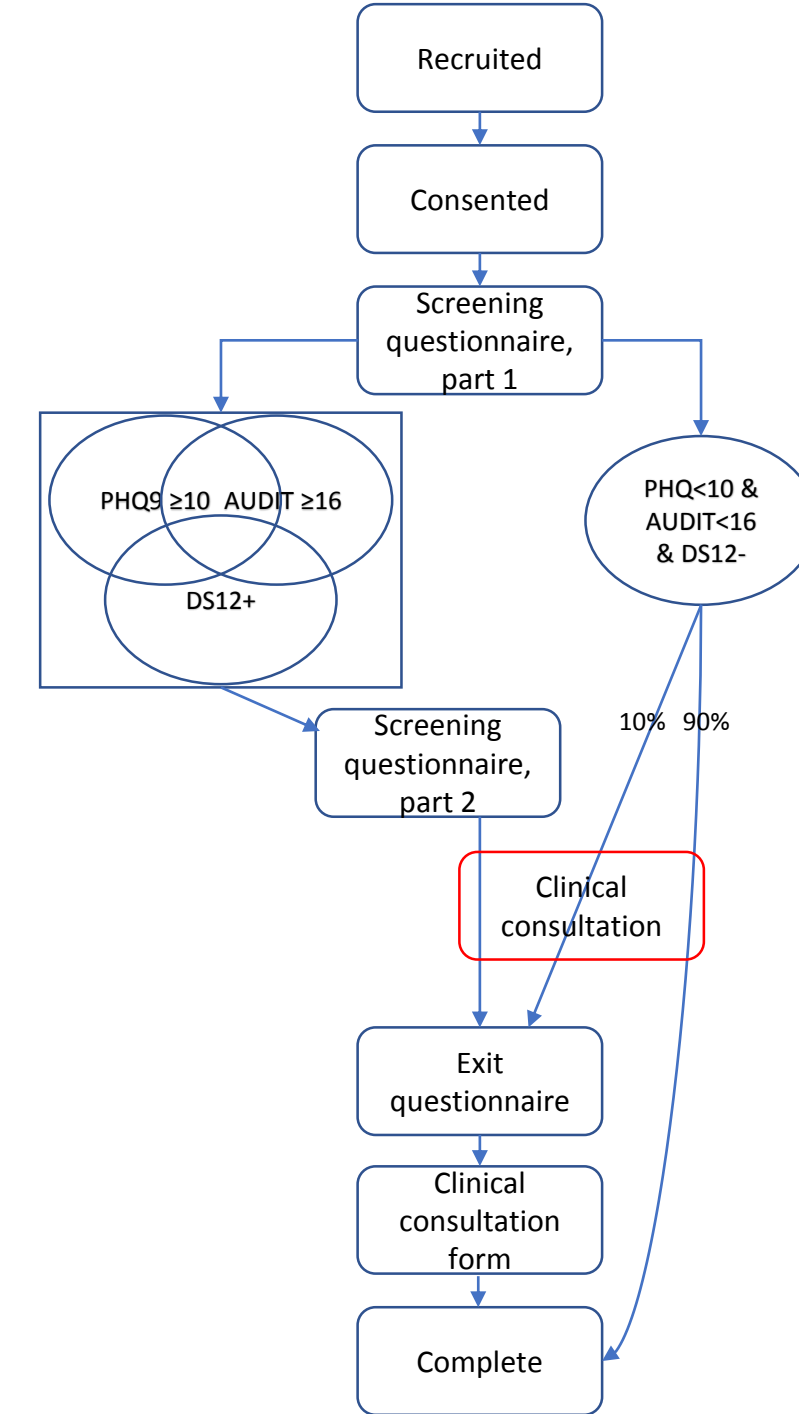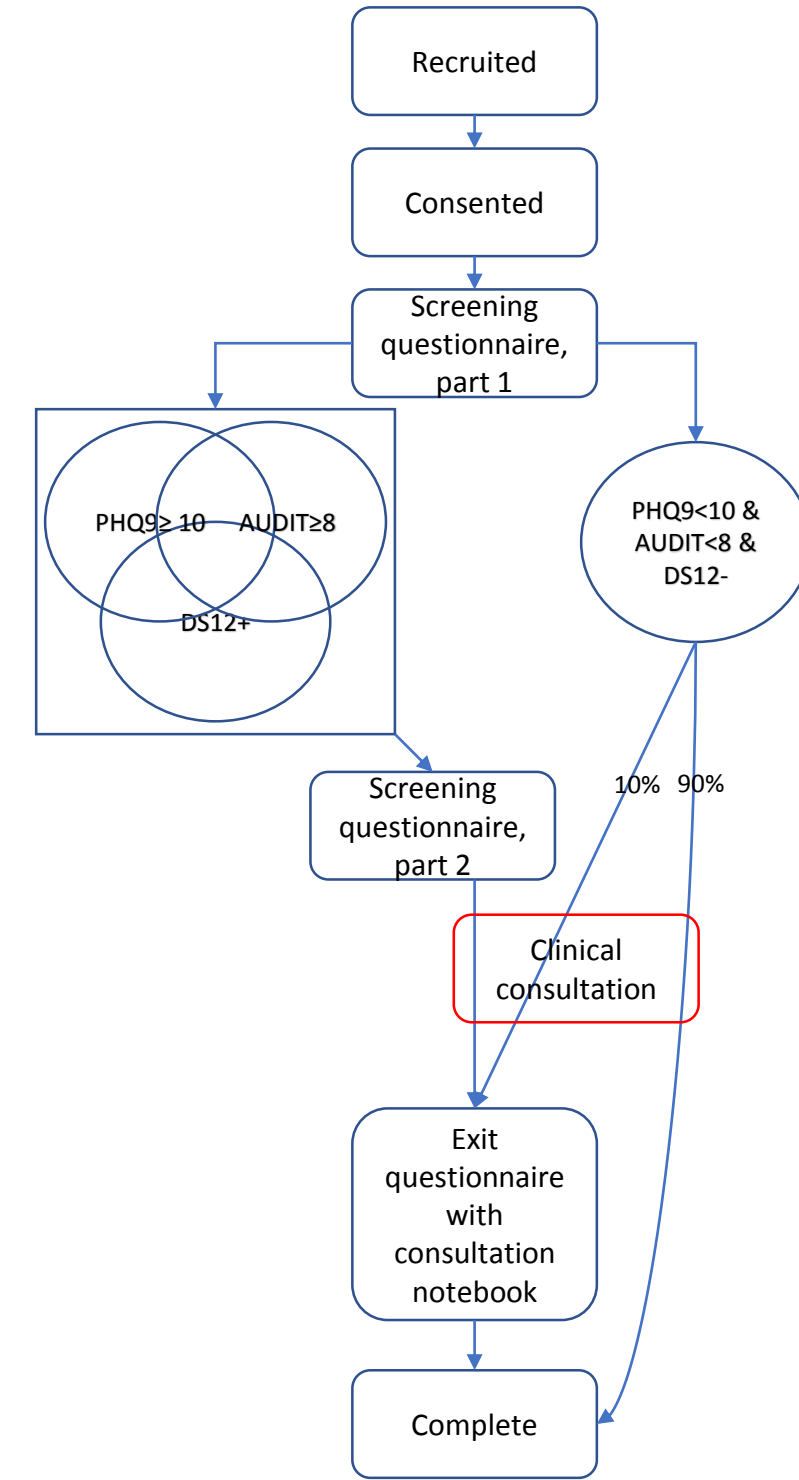

Supplement: bmjopen-2018-023421supp001.pdf [file bmjopen-2018-023421supp001.pdf]
